1 **Inhibition of KDM1A activity restores adult neurogenesis and improves**  
2 **hippocampal memory in a mouse model of Kabuki syndrome**

3 **Running title:** TAK-418 rescues intellect in Kabuki syndrome mice

4 Li Zhang PhD<sup>1</sup>, Genay Pilarowski PhD<sup>1, #</sup>, Emilio Merlo Pich MD<sup>2</sup>, Atsushi Nakatani<sup>2</sup>,  
5 John Dunlop PhD<sup>3</sup>, Rina Baba<sup>2</sup>, Satoru Matsuda PhD<sup>2</sup>, Masaki Daini PhD<sup>2</sup>, Yasushi  
6 Hattori<sup>2</sup>, Shigemitsu Matsumoto PhD<sup>2</sup>, Mitsuhiro Ito PhD<sup>2</sup>, Haruhide Kimura PhD<sup>2</sup>, Hans  
7 Tomas Bjornsson MD PhD<sup>1,4,5,6\*</sup>

8 <sup>1</sup>McKusick-Nathans Institute of Genetic Medicine, Johns Hopkins University School of  
9 Medicine, Baltimore, MD, United States;

10 <sup>2</sup>Takeda Pharmaceutical Company Limited. Fujisawa, Kanagawa, Japan;

11 <sup>3</sup>Takeda Pharmaceutical Company Limited, London, United Kingdom;

12 <sup>4</sup>Department of Pediatrics, Johns Hopkins University School of Medicine, Baltimore, MD,  
13 United States;

14 <sup>5</sup>Faculty of Medicine, School of Health Sciences, University of Iceland, Reykjavik 101,  
15 Iceland;

16 <sup>6</sup>Landspítali University Hospital, Reykjavik, 101, Iceland.

17

18 **\*Corresponding author:** Hans Tomas Bjornsson, Department of Genetic Medicine,  
19 Johns Hopkins University School of Medicine, 733 N. Broadway St, MRB 415, Baltimore,  
20 MD, 21205, USA; phone: 410-502-0056; fax: 410-614-9246; email: [hbjorns1@jhmi.edu](mailto:hbjorns1@jhmi.edu)

21 **#Current affiliation:** Stanford University School of Medicine, Palo Alto, CA 94304, USA.

22 **Keywords:** Epigenetics, adult neurogenesis, histone modification, therapeutics

23 **Abstract**

24 Kabuki syndrome (KS) is a rare cause of intellectual disability primarily caused by loss of  
25 function mutations in lysine-specific methyltransferase 2D (*KMT2D*), which normally  
26 adds methyl marks to lysine 4 on histone 3. Previous studies have shown that a mouse  
27 model of KS (*Kmt2d*<sup>+/βGeo</sup>) demonstrates disruption of adult neurogenesis and  
28 hippocampal memory. Proof-of-principle studies have shown postnatal rescue of  
29 neurological dysfunction following treatments that promote chromatin opening, however,  
30 these strategies are non-specific and do not directly address the primary defect of  
31 histone methylation. Since lysine-specific demethylase 1A (LSD1/KDM1A) normally  
32 removes the H3K4 methyl marks added by KMT2D, we hypothesize that inhibition of  
33 KDM1A demethylase activity may ameliorate molecular and phenotypic defects

34 stemming from KMT2D loss. To test this hypothesis, we evaluated a recently developed  
35 KDM1A inhibitor (TAK-418) in *Kmt2d*<sup>+/ $\beta$ Geo</sup> mice. We find that orally administered TAK-  
36 418 increases the numbers of newly born Doublecortin (DCX)<sup>+</sup> cells and processes in  
37 hippocampus in a dose dependent manner. We also observe TAK-418-dependent  
38 rescue of histone modification defects in hippocampus both by Western blot and ChIP-  
39 Seq. Treatment rescues gene expression abnormalities including those of immediate  
40 early genes such as FBJ osteosarcoma oncogene (*Fos*) and FBJ osteosarcoma  
41 oncogene homolog B (*Fosb*). After 2 weeks of TAK-418, *Kmt2d*<sup>+/ $\beta$ Geo</sup> mice demonstrate  
42 normalization of hippocampal memory defects. In summary, our data suggest that  
43 KDM1A inhibition is a plausible treatment strategy for KS and support the hypothesis  
44 that the epigenetic dysregulation secondary to KMT2D dysfunction plays a major role in  
45 the postnatal neurological disease phenotype in KS.

## 46 Introduction

47 Kabuki syndrome (KS) is a rare Mendelian disorder that affects multiple systems  
48 including neuro, immune, auditory and cardiac systems<sup>1</sup>. It is characterized by distinctive  
49 facial features, growth retardation, and mild to moderate intellectual disability<sup>2</sup>. Human  
50 genetics studies have revealed that this autosomal dominant/X-linked condition is  
51 caused by heterozygous/hemizygous loss of function in either of two genes with  
52 complementary function: *KMT2D* on human chromosome 12 or lysine-specific  
53 demethylase 6A (*KDM6A*) on human X chromosome<sup>3,4</sup>. Both of these disease genes  
54 encode histone modifiers that contribute to the opening of chromatin. The majority  
55 (>70%) of molecularly confirmed cases of KS have loss-of-function variants in *KMT2D*.  
56 *KMT2D* catalyzes the addition of methyl groups to lysine 4 of histone 3 (H3K4me1 and  
57 3)<sup>5,6</sup>, which are marks associated with open chromatin. *KDM6A* also participates in  
58 chromatin opening by removing H3K27me3, a closed chromatin mark<sup>7</sup>. It is, therefore,  
59 likely that the observed gene dosage sensitivity in KS results from an imbalance  
60 between open and closed chromatin states at or around critical target genes. We  
61 hypothesize that it may be possible to restore this balance with drugs that promote open  
62 chromatin states<sup>8</sup>.

63 Our laboratory characterized a novel mouse model of KS1 (*Kmt2d*<sup>+/ $\beta$ Geo</sup>) and  
64 found that these mice have many features that overlap with KS patient phenotypes  
65 including craniofacial abnormalities, growth retardation and immune dysregulation<sup>9-11</sup>.  
66 These mice also demonstrate an ongoing deficiency of adult neurogenesis in the

67 subgranular zone (SGZ) of the dentate gyrus (DG) in the hippocampus and hippocampal  
68 memory defects. We have previously shown that these deficiencies improve after a short  
69 term (2-3 weeks) oral treatment with a histone deacetylase inhibitor (HDACi), AR42<sup>9</sup>.  
70 Modulation of epigenetic modifications through dietary elevation of beta-hydroxybutyrate,  
71 an endogenous HDACi, may also rescue these same phenotypes<sup>10</sup>. However, both of  
72 these strategies are indirect, affecting chromatin opening through modulation of histone  
73 acetylation rather than histone methylation. Furthermore, HDACi have been poorly  
74 tolerated in clinical trials<sup>12</sup> and a ketogenic diet, is very stringent and hard to implement  
75 in children that often have baseline feeding problems and growth retardation as is the  
76 case in Kabuki syndrome. Recently, genetic disruption of KDM1A, the factor that  
77 normally removes H3K4me1-2 was shown to rescue disrupted chromatin states in  
78 KMT2D-deficient embryonic stem cells<sup>13</sup>. Here, we use a novel specific inhibitor of  
79 KDM1A activity, TAK-418, to demonstrate *in vivo* rescue of adult DG neurogenesis,  
80 improvement of hippocampal memory deficits, chromatin remodeling, and gene  
81 expression abnormalities in *Kmt2d*<sup>+/ $\beta$ Geo</sup> mice. TAK-418, also called 5-((1*R*,2*R*)-2-  
82 [(cyclopropylmethyl)-amino]cyclopropyl)-*N*-(tetrahydro-2*H*-pyran-4-yl)thiophene-3-  
83 carboxamide monohydrochloride, was successfully progressed in preclinical  
84 development and was recently given orphan designation by the European Medical  
85 Agency (EMA) and the US Food and Drug Administration (FDA) for the treatment of KS.  
86 TAK-418 has already undergone Phase 1 studies on healthy volunteers to establish  
87 safety and tolerability (clinicaltrials.gov, NTC03228433 and NCT03501069). Therefore,  
88 the TAK418-dependent rescue of disease phenotypes in *Kmt2d*<sup>+/ $\beta$ Geo</sup> mice provides  
89 support for a possible therapeutic role in KS.

## 90 **Methods**

91 **Animals:** Our mouse model, *Kmt2d*<sup>+/ $\beta$ Geo</sup>, also named *Mll2Gt*<sup>(RR1024)Byg</sup>, was originally  
92 acquired from Bay Genomics (University of California) but backcrossed in the Bjornsson  
93 laboratory. All experimental mice were on a fully backcrossed C57BL/6J background  
94 (99% verified using a mouse SNP chip). For treatment with TAK-418, mice were orally  
95 gavaged daily with drug (TAK-418, Takeda) solubilized in vehicle (methylcellulose) or  
96 with vehicle alone. Both drug and vehicle (methylcellulose) were shipped from Takeda.  
97 Drug was administered for 14 days for adult neurogenesis studies, after which mice  
98 were sacrificed on day 15. For behavioral studies, Morris water maze testing was  
99 initiated at day 15 after treatment start at ~8 weeks of age, and the drug was continued

100 throughout the behavioral studies (until at least day 23). A dose curve was initially  
101 performed with three doses (0.5 mg/kg/day, 1 mg/kg/day, 2 mg/kg/day). However, after  
102 that initial study, all other experiments were done with a dose of 1 mg/kg/day. For  
103 quantification of spleen size, evaluation was performed after 8 weeks of TAK-418 started  
104 at age of ~8 weeks old, since splenomegaly is not observed until 12-16 weeks. For this  
105 reason, this cohort was kept on TAK-418 for ~8 weeks for this reason and to evaluate for  
106 side effects. Mouse numbers for individual studies: ChIP-Seq/RNA-Seq: 3-4 per group;  
107 immunohistofluorescence: n = 11-12 per group; RT-qPCR: 5-6 per group; behavioral  
108 testing: 24-30 per group. Genotyping was performed using the following primers:  
109 Mll2\_exon50F: CTGTGTGGAACCGCATCATTG; Mll2\_exon51R:  
110 CGGTTCTGATCTGGCACAGCC;  $\beta$ -GeoR1: CTCAGTGCAGTGCAGTCAGG. The  
111 Mll2\_exon50F and Mll2\_exon51R pair amplify sequences from the wild allele of KMT2D,  
112 the Mll2\_exon50F and  $\beta$ -GeoR1 pair amplify sequences specific for the targeted allele.  
113 All experiments were performed using mouse protocols approved by the Animal Care  
114 and Use Committee of Johns Hopkins University School of Medicine. The mouse  
115 protocols used for this study are in accordance with the guidelines used by the National  
116 Institutes of Health (NIH) for mouse care and handling.

117

118 **Perfusion and cryosectioning:** Mice were sacrificed with a lethal dose of xylazine,  
119 ketamine combination, after which they were transcardially flushed with PBS (1x) with  
120 heparin and then perfused with 4% PFA/PBS. Brains were removed from the skulls and  
121 cryopreserved in 30% sucrose 0.1M phosphate solution overnight at 4°C. Brains were  
122 frozen and sectioned using a Microm HM 550 cryostat (Thermo Scientific). Sectioning  
123 was performed at 30 $\mu$ m intervals and every section of the brain was collected onto the  
124 slide in a series of 6 slides with 12 slices on each slide and stored in a -80°C freezer  
125 prior to use.

126

127 **Immunofluorescence staining:** Pre-mounted slides were thawed and washed once in  
128 TBS (1x). Slices were briefly permeabilized in TBS(1x) with 0.4% Triton X-100 (30min),  
129 followed by blocking with TBS with 3% donkey serum and 0.05% Triton X-100 for 1hr at  
130 room temperature. Next each slide was incubated with primary antibody (in TBS with 3%  
131 donkey serum and 0.05% Triton X-100) overnight (O/N) at 4°C. After 3-5 washes in TBS  
132 with 0.05% Triton X-100, Alexa Fluor conjugated secondary antibodies with DAPI  
133 counterstain was added to the slide for 1 hour (hr) at room temperature. Slides were

134 mounted with ProLong antifade (ThermoFisher Scientific, catalog# P36930) after several  
135 washes in TBS with 0.05% Triton X-100 and a final wash of TBS. Images were taken  
136 with LSM780 confocal microscope. Antibodies used included anti-DCX (Santa Cruz,  
137 catalog #sc-8066) and anti-c-fos (Abcam, catalog #190289).

138

139 **Granule cell layer and quantification of DCX<sup>+</sup> cells:** The area of the granule cell layer  
140 and DCX<sup>+</sup> cells was measured using ImageJ as previously described<sup>9</sup>. Briefly, we traced  
141 the granule cell layer by hand and counted DCX<sup>+</sup> positive cells within this area in all  
142 slides. Counting was performed by an investigator that was blinded to genotype and/or  
143 drug exposure.

144

145 **Western blotting:** Hippocampus was dissected, snap frozen and kept in -80°C.  
146 Histones were extracted following a published acid extraction protocol<sup>14</sup>. Briefly, 250µl of  
147 TED buffer (0.5% Triton x 100, 2mM PMSF and 0.02% NaN<sub>3</sub> in PBS) was added and  
148 hippocampal tissue was disaggregated by 50-60 strokes with a pellet pestle. Nuclear  
149 pellets were collected at 10,000rpm for 1 minute (min) at 4°C and resuspended in 50µl  
150 of acid extraction buffer (0.5N HCl in 10% glycerol). After O/N incubation in acid  
151 extraction buffer, supernatant was collected and histones were precipitated with acetone  
152 O/N at -20°C. Histone pellets were subsequently dissolved in water. For whole cell  
153 lysate, we disaggregated hippocampal tissue in RIPA buffer (150mM NaCl, 1.0% NP-40,  
154 0.5% Na Deoxycholate, 0.1% SDS, 50mM Tris, pH8.0) by 50-60 strokes with pellet  
155 pestle. After incubation for 2h at 4°C, supernatant was collected. Amount of protein was  
156 quantified using a BSA protein assay. Proteins were fractionated in 4-12% NuPAGE bis-  
157 tris gel. Antibodies used included the following: anti-histone H3 (Cell Signaling  
158 Technologies, catalog #3638), anti-H3K4me3 (Cell Signaling Technologies, catalog #  
159 9727), anti-H3K4me2 (Cell Signaling Technologies, catalog #9725), anti-  
160 H3K4me1 (Abcam, catalog #ab8895), anti-c-fos (Abcam, catalog #190289), anti-  
161 phospho-p44/42 MAPK(Erk1/2) (Cell Signaling Technologies, catalog #9106), anti-  
162 p44/42 MAPK(Erk1/2) (Cell Signaling Technologies, catalog #9102), anti-β-Actin (Cell  
163 Signaling Technologies, catalog#3700).

164 **Behavioral testing:** No exclusion criteria were used other than decreased visual acuity  
165 as evaluated by visible platform training (see below). Investigator was blinded to  
166 genotype and drug exposure status during testing. Morris water maze testing: Mice were

167 placed in a 1.1 meter diameter tank filled with room temperature water dyed with  
168 nontoxic white paint. For analytical purposes, the tank was divided into four quadrants,  
169 with one quadrant containing a small platform submerged 1.5 cm beneath the water. On  
170 each day of training, mice were placed in the tank in a random quadrant facing away  
171 from the center and allowed to swim until they found the platform. Once they reached  
172 the platform they were left there for 30 seconds (s). If they did not reach the platform  
173 after 60s, they were placed on it for 30s. Each mouse was given four trials per day (for 5  
174 days) with an inter-trial interval of 5-20 m and subsequently returned to its home cage.  
175 Latency to reach the platform was measured during each trial. The day after the final day  
176 of training, the platform was removed for a probe trial where mice were placed in the  
177 tank for 90s. The average number of crossings of the platform's previous location was  
178 recorded. Visible/flagged platform training was also performed for 3 days right before the  
179 hidden platform to ensure no problems with sight. During visible training a visible flag  
180 was placed on the submerged platform, and the time for each mouse to reach the  
181 platform was measured during each 60-s trial, four of which were run in the same way as  
182 the hidden platform training. For all training and probe testing, data were recorded both  
183 manually and electronically with ANY-maze software (San Diego Instruments) when  
184 applicable. Differences in the number of platform crossings, the latency of the first  
185 crossing of the platform during the probe trial were compared between groups with a  
186 Student's t test with significance value set at  $p < 0.05$ .

187

188 **RNA-Seq/ChIP-Seq:** For RNA-Seq and ChIP-Seq, 2-week old mice were given TAK-  
189 418 at a dose of 1mg/kg body weight for a period of 2 weeks. Hippocampi were  
190 harvested at the end of the 2 week treatment. RNA was extracted with Direct-zol RNA  
191 microprep kit (ZYMO Research), RNA-Seq libraries were constructed with NEBNext  
192 Ultra RNA library prep kit for Illumina. Pooled RNA libraries were sequenced on a  
193 Hiseq2500 using 150 bp paired-end sequencing. For ChIP-Seq library construction,  
194 nuclear lysate preparation and chromatin IP were followed the ENCODE protocol from  
195 Bing Ren lab with chip graded anti-H3K4me3 (Abcam, catalog #ab8580) and anti-  
196 H3K4me1 (Abcam, catalog #ab8895). After reverse cross-linking and purifying the DNA  
197 fragments, library construction was performed with the NEBNextUltraII DNA library prep  
198 kit for Illumina based on manufacturer's recommendations. Pooled ChIP DNA libraries  
199 were sequenced on a Hiseq2500 using a flow cell for 150 bp paired-end size.

200



201 **RNA-Seq/ChIP-Seq analysis:** RNA-Seq: Transcriptomic data collected by RNA  
202 sequencing (RNA-Seq) was analyzed to determine the genes that are present in each  
203 sample and condition, their expression levels, and the differences between expression  
204 levels among different experimental conditions. Following quality checking with the  
205 software Fastqc, reads were mapped to the mouse genome version mm10 with the  
206 alignment tool Tophat2 v.2.1.0<sup>15</sup>, which allows for large 'gaps' in the alignment,  
207 representing introns. The aligned reads were assembled with CLASS2 v.2.1.7<sup>16</sup> to  
208 create partial genes and transcript models (transfrags). Transfrags from all samples  
209 were further merged with Cuffmerge and mapped to the GENCODE v.M17 gene  
210 models<sup>17</sup>, to create a unified set of gene annotations for differential analyses. Lastly,  
211 gene (transcript) expression levels were computed, and differentially expressed genes  
212 (transcripts) were determined separately with the tools Cuffdiff2 v.2.2.1<sup>18</sup> and DESeq<sup>19</sup>.  
213 Differentially expressed genes were further analyzed and graphed with R, a public free  
214 resource for statistical computing and graphing. ChIP-Seq: The reads collected by  
215 H3K4me1 and H3K4me3 ChIP sequencing were first trimmed 5bp at 5'end with the  
216 software seqtk (<https://github.com/lh3/seqtk>), followed by mapping with the short  
217 sequence alignment tool bowtie2<sup>20</sup>. The aligned sequences were indexed with software  
218 samtools for easy viewing in IGV (Integrated Genome Viewer). The THOR software<sup>21</sup>  
219 was then used to detect and analyze differential peaks in two sets of ChIP-Seq data  
220 from distinct biological conditions with replicates. HOMER<sup>22</sup> and GO analysis  
221 (<http://geneontology.org/>) was used to annotate the peaks, and custom scripts were  
222 written to filter THOR output, gather statistics and reformat files. Differential peaks were  
223 further analyzed and graphed with R.

224

## 225 **Results**

### 226 ***Kmt2d*<sup>+/ $\beta$ Geo</sup> mice demonstrate a global decrease of histone H3K4 methylation in** 227 **the hippocampus**

228 *Kmt2d*<sup>+/ $\beta$ Geo</sup> mice contain an expression cassette encoding a  $\beta$ -galactosidase  
229 neomycin resistance fusion protein ( $\beta$ -Geo) inserted into intron 50 of the *Kmt2d* gene  
230 locus on mouse chromosome 15. This cassette contains a 5' end splice acceptor  
231 sequence and a 3' end cleavage and polyadenylation signal. The mutated allele,  
232 therefore, results in a truncated KMT2D protein with the peptide encoded by the first 50  
233 exons of KMT2D fused to  $\beta$ -Geo at the C-terminus<sup>9</sup>. The truncated KMT2D fusion  
234 protein, therefore, lacks the C-terminal catalytic SET domain of KMT2D, which is

235 responsible for its H3K4 methyltransferase activity. Because KMT2D is a prominent  
236 mammalian H3K4 methyltransferase and *Kmt2d*<sup>+/ $\beta$ Geo</sup> mice have disrupted hippocampal  
237 neurogenesis, we hypothesized we would see diminished levels of mono- and di-  
238 methylated H3K4 (H3K4me1/2) in the granule cell layer of the dentate gyrus in  
239 *Kmt2d*<sup>+/ $\beta$ Geo</sup> mice. To test this, we performed Western blots of histone extracts from  
240 mouse hippocampi and observed significantly ( $p < 0.0001$ ) reduced levels of H3K4me1  
241 and H3K4me2 in *Kmt2d*<sup>+/ $\beta$ Geo</sup> mice compared to *Kmt2d*<sup>+/+</sup> littermates when normalized to  
242 total histone 3 (H3) (Fig. 1a-b). Therefore, although KMT2D and Lysine  
243 Methyltransferase 2C (KMT2C) have some overlapping function, our results indicate that  
244 the latter is unable to compensate for the heterozygous loss of *Kmt2d* in the  
245 hippocampus.

246 Previously it has been reported that KMT2D is required for H3K4 trimethylation  
247 (H3K4me3) in bivalent promoters<sup>23</sup>. Indeed, we find that the level of H3K4me3 is also  
248 reduced (Fig. 1c), and that the ratio of H3K4me3 to total histone 3 is significantly  
249 reduced in *Kmt2d*<sup>+/ $\beta$ Geo</sup> mice compared to *Kmt2d*<sup>+/+</sup> littermates ( $p < 0.0016$ ), although to a  
250 lesser extent than the observed deficiencies of H3K4me1/2.

251

### 252 **TAK-418 treatment rescues the deficiency of mono- and di-methylated, but not tri-** 253 **methylated, H3K4 in the hippocampus of *Kmt2d*<sup>+/ $\beta$ Geo</sup> mice**

254 TAK-418 is a selective inhibitor of the lysine-specific demethylase  
255 1(KDM1A/LSD1) recently developed by Takeda Pharmaceutical Company Limited.  
256 KDM1A, in association with the corepressor of REST1 (CoREST) complex, removes  
257 methylation at H3K4me1/2 sites<sup>24-27</sup>. Previously, genetic disruption of *KDM1A* was found  
258 to rescue differentiation defects in KMT2D-deficient embryonic stem cells<sup>13</sup>. To test  
259 whether TAK-418 is able to rescue epigenetic abnormalities *in vivo* in the hippocampus,  
260 mice were given TAK-418 at 1mg/kg/day by oral administration for two weeks. Histones  
261 were then extracted from dissected hippocampus for analysis. We observed significant  
262 rescue ( $p < 0.05$ ) by TAK-418 treatment of the deficient H3K4me1 levels in *Kmt2d*<sup>+/ $\beta$ Geo</sup>  
263 mice compared to *Kmt2d*<sup>+/+</sup> littermates (Fig. 1a). Similarly, we observed a significant  
264 rescue ( $p < 0.05$ ) of H3K4me2 levels in *Kmt2d*<sup>+/ $\beta$ Geo</sup> mice with TAK-418 compared to  
265 littermates on vehicle (Fig. 1b). H3K4me3 levels were also increased by TAK-418, albeit  
266 not to statistical significance (Fig. 1c). Thus, in summary, we observe biochemical  
267 rescue of H3K4 methylation in hippocampus, a disease relevant tissue. As expected,  
268 effects of TAK-418 on all three H3K4 methylation marks were largely correlated.



269

## 270 **TAK-418 rescues defects of adult neurogenesis in *Kmt2d*<sup>+/ $\beta$ Geo</sup> mice**

271 Adult hippocampal neurogenesis is an ongoing process that persists throughout  
272 life<sup>28,29</sup> in which adult-born neural progenitors in the subgranular zone (SGZ) give rise to  
273 excitatory granule cell neurons residing in the hippocampal dentate gyrus (DG)<sup>29</sup>. The  
274 neuroblast migration protein DCX is highly expressed in immature neurons and sharply  
275 decreases with maturation of neurons<sup>30,31</sup>, providing a cell stage/type-specific marker to  
276 quantify adult neurogenesis *in vivo*. We tested the effects of TAK-418 on adult  
277 neurogenesis as measured by DCX<sup>+</sup> cells per mm<sup>2</sup> in the DG and SGZ. As before<sup>9,10</sup>, we  
278 find decreased numbers of DCX<sup>+</sup> cells in *Kmt2d*<sup>+/ $\beta$ Geo</sup> mice compared to *Kmt2d*<sup>+/+</sup>  
279 littermates. On TAK-418 treatment, this phenotype showed dose-dependent  
280 normalization (Supplementary Fig. 1) with full rescue at the medium dose (1 mg/kg/day,  
281 Fig. 1d, e). Dendrites can be visualized in some DCX<sup>+</sup> cells, as DCX is a cytoplasmic  
282 protein that is associated with microtubules present in dendrites<sup>32,33</sup>. We counted the  
283 DCX<sup>+</sup> cells with dendrites and found that *Kmt2d*<sup>+/ $\beta$ Geo</sup> mice have fewer DCX<sup>+</sup> cells with  
284 dendrites compared to *Kmt2d*<sup>+/+</sup> littermates (Fig. 1f), although this likely, to some extent,  
285 reflects absolute cell numbers. *Kmt2d*<sup>+/ $\beta$ Geo</sup> mice treated with TAK-418 have significantly  
286 increased numbers of DCX<sup>+</sup> cells with dendrites compared to *Kmt2d*<sup>+/ $\beta$ Geo</sup> mice treated  
287 with vehicle (Fig. 1f). The dendrites in the *Kmt2d*<sup>+/ $\beta$ Geo</sup> mice also appeared shorter than  
288 the dendrites in *Kmt2d*<sup>+/+</sup> littermates, which reached farther into the granule cell layer and  
289 even into the molecular cell layer. TAK-418 treatment restored the dendrite length and  
290 characteristics in *Kmt2d*<sup>+/ $\beta$ Geo</sup> mice resulting in longer dendrites extending throughout the  
291 granule cell layer and into the molecular cell layer (Supplementary Fig. 2).

292

## 293 **TAK-418 treatment rescues the genome-wide deficiency of H3K4 methylation in** 294 ***Kmt2d*<sup>+/ $\beta$ Geo</sup> mice**

295 Given the global H3K4 methylation deficiency and rescue by TAK-418 in the  
296 hippocampus of *Kmt2d*<sup>+/ $\beta$ Geo</sup> mice, we next interrogated the genome-wide histone profiles  
297 in hippocampus by chromatin immunoprecipitation and high-throughput sequencing  
298 (ChIP-Seq). We first performed H3K4me1-ChIP-Seq on hippocampi harvested from  
299 *Kmt2d*<sup>+/ $\beta$ Geo</sup> and *Kmt2d*<sup>+/+</sup> mice treated with either vehicle or TAK-418. The majority of  
300 H3K4me1 peaks (~57.7%) appeared in intergenic regions which is consistent with  
301 known enhancer-associated roles of this mark<sup>5</sup>. A third of peaks (~31.2%) appeared to  
302 be in introns, and fewer were at the promoter/transcription start site (~2.7%) or

303 transcription start site (~1.8%). There was no obvious difference between the two  
304 genotypes. In untreated hippocampi, we observed a total of 621 differentially bound  
305 peaks of H3K4me1 in *Kmt2d*<sup>+/ $\beta$ Geo</sup> mice relative to *Kmt2d*<sup>+/+</sup> (Fig. 2a, Supplementary  
306 Table S1). Of these, 396 peaks were decreased and 225 were increased in vehicle-  
307 treated *Kmt2d*<sup>+/ $\beta$ Geo</sup> compared to *Kmt2d*<sup>+/+</sup> littermates (Fig. 2a). The 28 most statistically  
308 significant peaks are shown in Supplementary Table S1. In general, *Kmt2d*<sup>+/+</sup> mice had  
309 more differentially H3K4me1-bound peaks compared to *Kmt2d*<sup>+/ $\beta$ Geo</sup> mice when either  
310 genotype was on vehicle (396/225, 1.76/1, Fig. 2a). Upon treatment, we observed 622  
311 differentially bound H3K4me1 peaks, with 322 increased and 300 decreased in  
312 *Kmt2d*<sup>+/ $\beta$ Geo</sup> on TAK-418 compared to *Kmt2d*<sup>+/+</sup> mice on vehicle (Fig. 2b, Supplementary  
313 Table S2). The ratio of bound H3K4me1 in *Kmt2d*<sup>+/ $\beta$ Geo</sup> on TAK-418 compared to  
314 *Kmt2d*<sup>+/+</sup> mice on vehicle was 1 to 0.93 (Fig. 2b). An inverse linear regression revealed a  
315 correlation coefficient of -0.632 (Fig. 2c) of log2 fold change of the common bound loci  
316 between the comparison of *Kmt2d*<sup>+/+</sup>/*Kmt2d*<sup>+/ $\beta$ Geo</sup> on vehicle and *Kmt2d*<sup>+/ $\beta$ Geo</sup>/*Kmt2d*<sup>+/ $\beta$ Geo</sup>  
317 on TAK-418. These results indicate that TAK-418 treatment leads to generalized, albeit  
318 partial, rescue of the H3K4me1 deficiency.

319 We next performed H3K4me3 ChIP-Seq. As expected the majority of H3K4me3  
320 peaks are intragenic, with ~18-19% in the promoter region, ~16-17% peaks in exons,  
321 ~33-35% peaks in CpGs in introns and ~7% intergenic. There was no obvious difference  
322 in overall distribution between the two genotypes. We observed 262 loci that were  
323 increased and 1650 loci that were decreased in the *Kmt2d*<sup>+/ $\beta$ Geo</sup> mice compared to the  
324 *Kmt2d*<sup>+/+</sup> mice when vehicle treated (Fig. 2d, Supplementary Table S3). On average  
325 there is much more H3K4me3 bound in the *Kmt2d*<sup>+/+</sup> mice compared to *Kmt2d*<sup>+/ $\beta$ Geo</sup> mice  
326 with a ratio of 6.63/1 (Fig. 2d, both genotypes on vehicle). In contrast, when we  
327 compared *Kmt2d*<sup>+/ $\beta$ Geo</sup> treated with TAK-418 to *Kmt2d*<sup>+/+</sup> treated with vehicle control, we  
328 observed 612 significantly increased loci and 1972 significantly decreased loci in  
329 *Kmt2d*<sup>+/ $\beta$ Geo</sup> compared to *Kmt2d*<sup>+/+</sup> littermates. As before, we observe more H3K4me3  
330 binding upon treatment (3.22/1, *Kmt2d*<sup>+/ $\beta$ Geo</sup> on TAK-418/ *Kmt2d*<sup>+/+</sup> on vehicle, Fig. 2e,  
331 Supplementary Table S4). An inverse linear regression revealed a correlation coefficient  
332 (r) of -0.62636 upon plotting log2 fold change of the common bound loci between the  
333 comparison of *Kmt2d*<sup>+/+</sup>/*Kmt2d*<sup>+/ $\beta$ Geo</sup> on vehicle and *Kmt2d*<sup>+/ $\beta$ Geo</sup>/*Kmt2d*<sup>+/ $\beta$ Geo</sup> on TAK-418,  
334 suggesting partial rescue of the genome-wide-deficiency of H3K4me3 by TAK-418 (Fig.  
335 2f).

336

337 **Global gene expression changes are rescued in *Kmt2d*<sup>+/ $\beta$ Geo</sup> mice on TAK-418**

338 We next interrogated functional effects of the observed differential histone  
339 modifications, as measured by changes in gene expression, in order to define a list of  
340 potential KMT2D target genes in the hippocampus. We performed RNA-Seq on samples  
341 from whole hippocampi harvested from *Kmt2d*<sup>+/ $\beta$ Geo</sup> mice and *Kmt2d*<sup>+/ $\beta$ Geo</sup> littermates treated  
342 with or without TAK-418. Differential gene expression analysis between *Kmt2d*<sup>+/ $\beta$ Geo</sup> mice  
343 and *Kmt2d*<sup>+/ $\beta$ Geo</sup> littermates treated with vehicle control revealed a total of 136 differentially  
344 expressed genes (DEGs) (absolute log<sub>2</sub> fold change >0.5, Fig. 3a, Supplementary Table  
345 S5). Among the 136 DEGs, 74 genes were downregulated and 62 genes were  
346 upregulated in hippocampus from *Kmt2d*<sup>+/ $\beta$ Geo</sup> mice compared to *Kmt2d*<sup>+/ $\beta$ Geo</sup> littermates  
347 (Fig. 3a). Genes that were downregulated in *Kmt2d*<sup>+/ $\beta$ Geo</sup> mice compared to *Kmt2d*<sup>+/ $\beta$ Geo</sup>  
348 littermates were enriched for networks of ionic transport and negative regulation of  
349 synaptic signaling (Fig. 3b). The pathways affected by genes upregulated in *Kmt2d*<sup>+/ $\beta$ Geo</sup>  
350 mice compared to *Kmt2d*<sup>+/ $\beta$ Geo</sup> littermates included tissue development, adhesion and  
351 extracellular structure organization (Fig. 3b). After treatment with TAK-418, however, we  
352 observed a reversed pattern of expression effects. Among 130 DEGs, only 38 genes  
353 were downregulated and 92 genes were upregulated in *Kmt2d*<sup>+/ $\beta$ Geo</sup> mice on TAK-418  
354 compared to *Kmt2d*<sup>+/ $\beta$ Geo</sup> littermates treated with vehicle control (Fig. 3c, Supplementary  
355 Table S6). Pathways enriched among genes upregulated in *Kmt2d*<sup>+/ $\beta$ Geo</sup> mice treated  
356 with TAK-418 were involved in neurogenesis and neuronal projection development (Fig.  
357 3d). The majority of DEGs (absolute log<sub>2</sub> fold change <0.5) in *Kmt2d*<sup>+/ $\beta$ Geo</sup> mice  
358 compared to *Kmt2d*<sup>+/ $\beta$ Geo</sup> littermates were normalized with TAK-418 treatment (blue dots,  
359 Fig. 3c). Among the genes that were highly differentially expressed in untreated  
360 *Kmt2d*<sup>+/ $\beta$ Geo</sup> animals and rescued with TAK-418 were the immediate early genes *Fos* and  
361 *Fosb*, in addition to Neurexophilin-3 (*Nxph3*), relaxin/insulin-like family peptide receptor 1  
362 (*Rxfp1*), down-stream targets of extracellular-signal-regulated kinase (ERK) signaling,  
363 and ribosomal protein genes (Fig. 3e). When we plotted the log<sub>2</sub> fold change of the  
364 common genes found in the comparison of *Kmt2d*<sup>+/ $\beta$ Geo</sup>/*Kmt2d*<sup>+/ $\beta$ Geo</sup> on vehicle and  
365 *Kmt2d*<sup>+/ $\beta$ Geo</sup> on TAK-418/*Kmt2d*<sup>+/ $\beta$ Geo</sup> on vehicle, we observe a highly significant inverse  
366 correlation (R = -0.9) indicating that TAK-418 treatment of *Kmt2d*<sup>+/ $\beta$ Geo</sup> mice rescued the  
367 disrupted expression levels of genes in untreated *Kmt2d*<sup>+/ $\beta$ Geo</sup> mice to approximately  
368 what is normally seen in *Kmt2d*<sup>+/ $\beta$ Geo</sup> littermates (Fig. 3f).  
369

370 **The immediate early gene *Fos* shows decreased expression in *Kmt2d*<sup>+/ $\beta$ Geo</sup> mice**  
371 **that is rescued with TAK-418**

372 We validated gene expression of some of the most interesting candidate genes  
373 by RT-qPCR. NXPH3 is a specific ligand of synaptic alpha-neurexins and is essential for  
374 efficient neurotransmitter release<sup>34</sup>. *Nxph3* expression is significantly downregulated (p <  
375 0.009) in *Kmt2d*<sup>+/ $\beta$ Geo</sup> mice compared to *Kmt2d*<sup>+/+</sup> littermates (Fig. 4a). Upon treatment  
376 with TAK-418, we saw a modest increase of *Nxph3* levels (p < 0.09, Fig. 4a). *Fos* and  
377 *FosB* are immediately early genes that respond to extracellular stimuli. *Fos*, a marker of  
378 neuronal activity, has been associated with a number of neural and behavioral  
379 responses to acute stimuli expression. *Fos* expression is downregulated in *Kmt2d*<sup>+/ $\beta$ Geo</sup>  
380 mice (p < 0.05), however, upon treatment with TAK-418, the expression level of *Fos* is  
381 upregulated significantly (p < 0.03) (Fig. 4b). *FosB* expression trends mirrored those of  
382 *Fos*, but to a lesser degree (Fig. 4c). At the protein level, we observed a marginal  
383 decrease of FOS protein in total hippocampus lysate of *Kmt2d*<sup>+/ $\beta$ Geo</sup> mice compared with  
384 *Kmt2d*<sup>+/+</sup> littermate controls and a marginal increase of FOS protein upon treatment with  
385 TAK-418 in *Kmt2d*<sup>+/ $\beta$ Geo</sup> mice (Fig. 4d, e). We hypothesize that the incomplete rescue  
386 could be related to the differential cell type composition in samples from brain tissue. In  
387 support of this hypothesis, when we stained the mouse brain slices for FOS and counted  
388 FOS<sup>+</sup> positive cells and calculated the average number of FOS<sup>+</sup> positive cell per mm<sup>2</sup>  
389 from 9-10 slices per mouse with 3-5 mice each examination group (Supplementary Fig.  
390 3), we noticed significantly fewer FOS<sup>+</sup> positive cells per mm<sup>2</sup> of dentate gyrus in  
391 *Kmt2d*<sup>+/ $\beta$ Geo</sup> compared with *Kmt2d*<sup>+/+</sup> littermate controls (Fig. 4f, g). After 2 weeks of  
392 treatment with TAK-418 in *Kmt2d*<sup>+/ $\beta$ Geo</sup> mice, the average FOS<sup>+</sup> positive cells per mm<sup>2</sup>  
393 increased, although not to a significant level (Fig. 4f, g and Supplementary Fig. 3). *Fos*  
394 mediates a signaling cascade involving phosphorylation by extracellular signal-regulated  
395 kinases (ERKs). Activated (phosphorylated) ERK is known to be one of the regulators of  
396 *Fos* expression and activity. The decrease in *Fos* RNA and protein levels in *Kmt2d*<sup>+/ $\beta$ Geo</sup>  
397 mice prompted us to look at the phospho-ERK level in total hippocampal lysate. The  
398 ratio of phosphorylated ERK to total ERK was decreased significantly in *Kmt2d*<sup>+/ $\beta$ Geo</sup> mice  
399 compared with *Kmt2d*<sup>+/+</sup> littermate (Supplementary Fig. 4), supporting the hypothesis that  
400 the ERK based activation of the Fos signaling cascade is disrupted in *Kmt2d*<sup>+/ $\beta$ Geo</sup> mice.

401

402 **TAK-418 rescues the visuospatial learning and memory defect in *Kmt2d*<sup>+/ $\beta$ Geo</sup> mice**

403 Adult-born hippocampal neurons become integrated in the DG circuitry where  
404 they mediate neuronal plasticity in support of visuospatial learning and pattern  
405 discrimination. Previously we have shown that *Kmt2d*<sup>+/ $\beta$ Geo</sup> mice have defects in spatial  
406 learning and memory formation as evaluated by a Morris water maze test<sup>9</sup>. Here we  
407 confirm<sup>9,10</sup> that vehicle treated *Kmt2d*<sup>+/ $\beta$ Geo</sup> mice persistently crossed the platform less  
408 frequently ( $p < 0.0007$ , Fig. 5a) than vehicle treated *Kmt2d*<sup>+/+</sup> littermates in the Morris  
409 water maze. We also found that *Kmt2d*<sup>+/ $\beta$ Geo</sup> mice demonstrate a longer latency to reach  
410 the platform ( $p < 0.0031$ , Fig. 5b) and spend less time on the platform (Fig. 5c) and in  
411 the quadrant with the platform ( $p < 0.0026$ , data not shown) compared to *Kmt2d*<sup>+/+</sup>  
412 littermates. The TAK-418 treatment considerably ameliorated the defect observed in  
413 *Kmt2d*<sup>+/ $\beta$ Geo</sup> mice in the Morris water maze test (Fig. 5a). In the final probe trial, the  
414 *Kmt2d*<sup>+/ $\beta$ Geo</sup> mice treated with TAK-418 had increased frequency of crossing the platform  
415 compared to untreated *Kmt2d*<sup>+/ $\beta$ Geo</sup> mice ( $p < 0.0206$ , Fig. 5a). Similarly, *Kmt2d*<sup>+/ $\beta$ Geo</sup>  
416 treated with vehicle consistently had increased latency to find the platform ( $p < 0.0088$ ,  
417 Fig. 5b) and spent less time on the platform ( $p < 0.0131$ , Fig. 5c) both of which were  
418 rescued with TAK-418. There didn't appear to be any obvious confounders of either drug  
419 or genotype on vision or muscle strength based on the results collected from the Morris  
420 water maze. Specifically, there were no major side effects on muscles or vision after  
421 treatment with TAK-418 for 2-3 weeks, as the average swimming speed was very similar  
422 in both genotypes on and off TAK-418 (Fig. 5d) and there was no difference in the 3-day  
423 visual trial with regard to the latency to find the platform (Fig. 5e). During the five days of  
424 training, the mice improved over time demonstrating appropriate learning, however, the  
425 *Kmt2d*<sup>+/ $\beta$ Geo</sup> mice appeared to perform worse (Supplementary Fig. 5) and were  
426 significantly worse on day 4 ( $p < 0.05$ ) but appeared to demonstrate some rescue on  
427 TAK-418, although it was not significant (repeated measures ANOVA).

428

#### 429 **TAK-418 is well tolerated in mice at therapeutic levels and leads to rescue of** 430 **splenomegaly, another disease relevant phenotype**

431 We observed no obvious side effects in the mice that were on TAK-418, including  
432 no effect on weight or general well-being (data not shown). We have previously  
433 observed splenomegaly at or around 4 months of age (data not shown). Given this  
434 finding, we kept a cohort of mice on TAK-418 for 8 weeks (starting at 2 months of age)  
435 and again observed no obvious side effect or impact on weight (no weight loss or weight  
436 gain). We did, however, observe splenomegaly in the *Kmt2d*<sup>+/ $\beta$ Geo</sup> mice treated with

437 vehicle, but correction of the splenomegaly in *Kmt2d*<sup>+/βGeo</sup> mice on TAK-418  
438 (Supplementary Fig. 6) indicating that this phenotype may also be malleable by TAK-418  
439 treatment.

## 440 Discussion

441 Post-translational modifications of histone proteins, such as acetylation,  
442 methylation, phosphorylation, and ubiquitination are thought to serve as crucial  
443 regulatory signals to control gene expression in eukaryotic cells and are important for  
444 maintaining genomic integrity<sup>35</sup>. Emerging evidence suggests that dysregulation of  
445 epigenetic modifications is mechanistically linked to both cancer and developmental  
446 defects including neurodevelopmental disorders<sup>36</sup>. Histone methylation, in particular,  
447 confers active or repressive chromatin states in a locus-specific manner. The histone  
448 methylation state is meticulously regulated by the balance between two opposing  
449 enzyme systems: lysine methyltransferases and lysine demethylases (KMTs and  
450 KDMs). Disease-causing variants in KMTs and KDMs have been identified in multiple  
451 disorders in patients with intellectual disability, indicating that altered regulation of  
452 histone methylation can lead to intellectual disability<sup>37</sup>. Pharmaceutical inhibition of  
453 epigenetic targets counteracting the epigenetic effects of these loss-of-function variants  
454 has been investigated as a possible therapeutic option in several epigenetic conditions  
455 including KS<sup>9,10,38</sup>.

456 In recent years, data have emerged that support the notion that KMT2D  
457 dysfunction affects cellular function in the hippocampus. These include several studies  
458 that report more severe visuospatial disruption (linked to hippocampus) in molecularly  
459 confirmed patients with KS compared to other individuals with non-KS intellectual  
460 disability<sup>39,40</sup>. MRI images also suggest a grossly smaller hippocampus in individuals  
461 with molecularly confirmed KS<sup>41</sup>. These studies help set the stage for a potential clinical  
462 trial, as do recently developed international diagnostic criteria for KS<sup>2</sup>. These data also  
463 support the strategy to focus on hippocampus and dentate gyrus to estimate the effect of  
464 treatment, although they in no way exclude that other brain regions or cell types play a  
465 role in the neurological disease phenotype in KS.

466 Recently, genetic targeting of *KDM1A* was found to rescue a cellular phenotype  
467 observed with loss of function of *KMT2D* in embryonic stem cells<sup>13</sup>. *KDM1A*, also known  
468 as LSD1 or AOF2, is the first identified FAD-dependent histone demethylase capable of  
469 specifically demethylating mono- and di-methylated lysine 4 of histone H3 (H3K4me1



470 and H3K4me2) the very marks placed by KMT2D<sup>24</sup>. This suggests the feasibility of a  
471 more targeted therapeutic strategy for Kabuki syndrome, namely KDM1A inhibition.  
472 KDM1A associates with HDAC1/2, CoREST, BHC80, and BRAF35<sup>25</sup>. BRAF35, with its  
473 HMG DNA-binding domain, is thought to recruit the KDM1A/CoREST complex to the  
474 target sites. Subsequent deacetylation of the histone tail by the HDAC1/2 at the target  
475 sites then enables KDM1A to demethylate H3K4<sup>26</sup>. It has been demonstrated that  
476 hyperacetylated nucleosomes are less susceptible to CoREST/LSD1-mediated  
477 demethylation<sup>42</sup>, suggesting that hypoacetylated nucleosomes may be the preferred  
478 physiological substrates. We have previously shown that AR-42, a histone deacetylase  
479 inhibitor (HDACi), can rescue the learning and memory defect in *Kmt2d*<sup>+/ $\beta$ Geo</sup> mice<sup>9</sup>.  
480 However, AR-42, a pan histone deacetylase inhibitor, likely impacts deacetylase  
481 activities indiscriminately across a range of distinct HDAC-containing multiprotein  
482 complexes. Such broad cellular effects may result in a narrow therapeutic window  
483 between disease efficacy and toxicity. Indeed, when we treated *Kmt2d*<sup>+/ $\beta$ Geo</sup> mice with  
484 AR-42, we began to observe the effect at 5mg/kg/d with full effect obtained at  
485 10mg/kg/d. At 25mg/kg/d, however, we started to observe cytotoxicity effect, reflected by  
486 fewer DCX<sup>+</sup> positive cells compared with *Kmt2d*<sup>+/ $\beta$ Geo</sup> mice treated with vehicle<sup>9</sup>. We had  
487 postulated that the treatment effect was likely indirect, primarily affecting histone  
488 acetylation, with a secondary effect on histone methylation<sup>9</sup>. An alternative hypothesis is  
489 that AR-42 exerts its effect through inhibition of HDAC1/2 activity in KDM1A-CoREST  
490 complex, leading to hyperacetylation of the target sites which are more resistant to  
491 KDM1A-mediated demethylation, thus retaining the H3K4 methylation. This may mean  
492 that low dose combined treatment with deacetylase inhibitor and demethylase inhibitor,  
493 or dual histone deacetylase and demethylase inhibitors targeting the CoREST complex  
494 may have synergistic effect and be a particularly effective treatment for Kabuki  
495 syndrome. In contrast to AR-42, TAK-418, received full effect at 1mg/kg/d with regards  
496 to DCX<sup>+</sup> positive cells and no adverse effect have been observed with higher dose of  
497 TAK-418. Thus, TAK-418, as specific inhibitor to KDM1A, may also have the potential to  
498 be a single agent treatment for KS through its effects on H3K4 methylation.

499 In addition to the expected global increase of H3K4me1 and H3K4me2 after  
500 treatment with TAK-418 in *Kmt2d*<sup>+/ $\beta$ Geo</sup>, we also observed a global increase of H3K4me3,  
501 likely due to the accumulation of H3K4me2 and subsequent conversion into H3K4me3  
502 by H3K4 methyltransferases. Alternatively, the KDM1A complex has been shown to be  
503 unstable while binding to methylated targets sites. iBRAF, the paralogue of BRAF35<sup>43</sup>,

504 may compete with BRAF35 for the same target sites and recruit KMT2A complex, which  
505 subsequently may enhance trimethylation of H3K4, however, this will need to be  
506 explored in future studies. Although, KDM1A-inhibiting treatment is promising for Kabuki  
507 syndrome, the dose will need to be optimized. This is obvious because missense  
508 mutations in *KDM1A* have been identified in three individuals with developmental  
509 delay<sup>44-46</sup>, indicating that too much KDM1A inhibition can be damaging. The  
510 developmental symptoms in these individuals are similar to those of Kabuki syndrome  
511 (MIM: 147920), characterized by distinct craniofacial features including widely spaced  
512 teeth and palatal abnormalities, indicate that too much disruption of KDM1A actively  
513 could also be detrimental to intellectual function. Although this protein also has non-  
514 epigenetic function, it is likely that the cause of the phenotypes relates to its epigenetic  
515 function because biochemical studies have demonstrated that these mutant proteins  
516 exhibit reduced stability and demethylase activity<sup>46</sup>, indicating a loss-of-function  
517 mechanism.

518 Our RNA and ChIP sequencing data indicate that the immediate early genes  
519 (IEGs) such as *Fos* and *FosB* may be one class of genes that is affected in Kabuki  
520 syndrome and show rescue on TAK-418. Rusconi, *et al.* have shown that the KDM1A  
521 complex interacts with serum response factor (SRF) under resting conditions and an  
522 enrichment of KDM1A complex with SRF has been detected in *c-fos* promoter which  
523 contains the serum response element (SRE). SRF is known to be constitutively bound to  
524 the DNA of its target genes and the interaction of the KDM1A complex with SRF  
525 modulates the H3K4 methylation level at the *fos* promoter<sup>47,48</sup>. We also noted gene  
526 expression changes that would be consistent with decreased ERK signaling and, in fact,  
527 ERK activation appears deficient in *Kmt2d*<sup>+/ $\beta$ Geo</sup> hippocampi compared to those in  
528 littermates. Previous data from fibroblasts from KS individuals and zebrafish models of  
529 Kabuki syndrome has implicated decreased activation of this pathway<sup>49,50</sup>, which is  
530 concordant with our observations. Thus, both studies reveal abnormalities of ERK  
531 signaling and future studies should further elucidate whether ERK abnormalities play a  
532 mechanistic role in the pathogenesis of Kabuki syndrome.

533 In summary, here we show that oral administration of a KDM1A specific inhibitor,  
534 TAK-418, can ameliorate neurological problems at the cellular, molecular, gene  
535 expression and functional levels in a mouse model of Kabuki syndrome (*Kmt2d*<sup>+/ $\beta$ Geo</sup>  
536 mice). TAK-418 treatment increases adult neurogenesis in adult mice, as indicated by  
537 increased DCX<sup>+</sup> cells in the granule cell layer of the hippocampus. At the molecular

538 level, TAK-418 increases the global level of mono-, di- and tri-methylated H3K4  
539 (H3K4me1/2/3) in *Kmt2d*<sup>+/ $\beta$ Geo</sup> mice as assessed by both Western blot and ChIP-Seq.  
540 TAK-418 treatment also corrects the differential gene expression profile abnormalities  
541 found in *Kmt2d*<sup>+/ $\beta$ Geo</sup> mice compared to *Kmt2d*<sup>+/+</sup> littermates. Finally, and most  
542 importantly, we show that TAK-418 can correct the functional deficits by improving the  
543 learning and memory behavior of *Kmt2d*<sup>+/ $\beta$ Geo</sup> mice. Currently we do not know if these  
544 effects will translate in humans. However, the present data are informative in respect to  
545 the TAK-418 dose range and exposure to be achieved to produce pharmacologically  
546 relevant effects in *Kmt2d*<sup>+/ $\beta$ Geo</sup> mice, contributing to better design for the clinical proof of  
547 concept trial. In summary, our data support the hypothesis that KS is a treatable cause  
548 of intellectual disability and that KDM1A inhibition, may be a novel and effective  
549 mechanism of action for the treatment of KS.  
550

#### 551 **Acknowledgements**

552 We are thankful for statistical analysis by Dr. Liliana Florea and Corina Antonescu,  
553 through the Computational Biology Consulting Core and support by Dr. Pletnikov in the  
554 JHMI behavioral core. H.T.B. is funded by the following sources: NIH: DP5OD017877,  
555 Louma G. Foundation, Icelandic Research Fund, #195835-051, #206806-051) and for  
556 this particular project with a grant from Takeda Pharmaceuticals.

557

#### 558 **Data availability**

559 All data have been posted to GEO and is available using accession numbers  
560 GSE146727, GSE146728, GSE146729.

561

#### 562 **Conflict of interest**

563 H.T.B. is a consultant for Millennium Therapeutics and this work was partially supported  
564 with a grant from Takeda who owns rights to TAK-418. E.M.P., J.D., A.N., R.B., S.M.,  
565 M.D., Y.H., S.M., M.I., and H.K. are employees of Takeda.

566 **References**

- 567 1. Adam MP, Hudgins L, Kabuki syndrome: A review. *Clin. Genet.* **67**, 209-19  
568 (2005).
- 569 2. Adam MP et al. Kabuki syndrome: International consensus diagnostic criteria. *J.*  
570 *Med. Genet.* **56**, 89-95 (2019).
- 571 3. Ng. SB et al. Exome sequencing identifies MLL2 mutations as a cause of Kabuki  
572 syndrome. *Nat. Genet.* **42**, 790-3 (2010).
- 573 4. Lederer D, et al. Deletion of KDM6A, a histone demethylase interacting with  
574 MLL2, in three patients with kabuki syndrome. *Am. J. Hum. Genet.* **90**, 119-24.  
575 (2012).
- 576 5. Guo C et al. KMT2D maintains neoplastic cell proliferation and global histone H3  
577 lysine 4 monomethylation. *Oncotarget*, **4**, 2144-53 (2013).
- 578 6. Kim JH, et al. UTX and MLL4 coordinately regulate transcriptional programs for  
579 cell proliferation and invasiveness in breast cancer cells, *Cancer Res.* **74**, 1705-  
580 17 (2014).
- 581 7. Agger K et al. UTX and JMJD3 are histone H3K27 demethylases involved in  
582 HOX gene regulation and development, *Nature*, **449**, 731-4 (2007).
- 583 8. Fahrner, JA and Bjornsson HT, Mendelian Disorders of the Epigenetic  
584 Machinery: Tipping the Balance of Chromatin States, *Annu. Rev. Genomics*  
585 *Hum. Genet.* **15**, 269-93 (2014).
- 586 9. Bjornsson HT et al., Histone deacetylase inhibition rescues structural and  
587 functional brain deficits in a mouse model of Kabuki syndrome, *Sci. Transl. Med.*  
588 **6**, 256ra13 (2014).
- 589 10. Benjamin JS et al., A ketogenic diet rescues hippocampal memory defects in a  
590 mouse model of Kabuki syndrome, *Proc. Natl. Acad. Sci.* **114**, 125-130 (2017).
- 591 11. Pilarowski GO, Cazares T, Zhang L, Benjamin JS, Liu K, Jagannathan S, Mousa  
592 N, Kasten J, Barski A, Lindsley AW, Bjornsson HT. Abnormal Peyer patch  
593 development and B-cell gut homing drive IgA deficiency in Kabuki syndrome. *J*  
594 *Allergy Clin Immunol.* **S0091-6749**, 31627-6 (2019).
- 595 12. Subramanian S, Bates SE, Wright JJ, Espinoza-Delgado I, Piekarcz RL. Clinical  
596 Toxicities of Histone Deacetylase Inhibitors. Pharmaceuticals (Basel).  
597 **3**, 2751-2767 (2010).

- 598 13. Cao K, et al., An Mll4/COMPASS-Lsd1 epigenetic axis governs enhancer  
599 function and pluripotency transition in embryonic stem cells, *Sci. Adv.* **4**,  
600 eaap8747. (2018).
- 601 14. Shechter D, Dormann HL, Allis CD, Hake SB, Extraction, purification and  
602 analysis of histones, *Nat. Protoc.* **2**, 1445-57. (2007).
- 603 15. Kim D et al., TopHat2: accurate alignment of transcriptomes in the presence of  
604 insertions, deletions and gene fusions. *Genome Biol.* **14**, R36. (2013)
- 605 16. Song L, Sabunciyan S, Florea L. CLASS2: accurate and efficient splice variant  
606 annotation from RNA-seq reads. *Nucleic Acids Res.* **44**, e98. (2016).
- 607 17. Frankish A, et al., GENCODE reference annotation for the human and mouse  
608 genomes. *Nucleic Acids Res.* **47**, D766-D773. (2019).
- 609 18. Trapnell C, et al. Differential analysis of gene regulation at transcript resolution  
610 with RNA-seq. *Nat Biotechnol.* **31**, 46-53 (2013).
- 611 19. Anders S, Huber W. Differential expression analysis for sequence count data.  
612 *Genome Biol.* **11**, R106 (2010).
- 613 20. Langmead B, Salzberg SL. Fast gapped-read alignment with Bowtie 2. *Nat*  
614 *Methods.* **9**, 357-9 (2012).
- 615 21. Allhoff M, Seré K, F Pires J, Zenke M, G Costa I. Differential peak calling of  
616 ChIP-seq signals with replicates with THOR. *Nucleic Acids Res.* **44**, e153 (2016).
- 617 22. Heinz, S. et al., Simple combinations of lineage-determining transcription factors  
618 prime cis-regulatory elements required for macrophage and B cell identities. *Mol*  
619 *Cell.* **38**, 576–589 (2010).
- 620 23. Denissov S, et al. Mll2 is required for H3K4 trimethylation on bivalent promoters  
621 in embryonic stem cells, whereas Mll1 is redundant, *Development.* **141**, 526-37  
622 (2014).
- 623 24. Shi Y, et al. Histone demethylation mediated by the nuclear amine oxidase  
624 homolog LSD1, *Cell*, **119**, 941-53. (2004).
- 625 25. Shi YJ, et al. Regulation of LSD1 histone demethylase activity by its associated  
626 factors, *Mol. Cell.* **19**, 857-64 (2005).
- 627 26. Hou H and Yu H, Structural insights into histone lysine demethylation. *Curr. Opin.*  
628 *Struct. Biol.* **20**, 739-48 (2010).
- 629 27. Kooistra SM, and Helin K, Molecular mechanisms and potential functions of  
630 histone demethylases, *Nat. Rev. Mol. Cell Biol.* **13**, 297-311 (2012).

- 631 28. Van Praag H et al. Functional neurogenesis in the adult hippocampus, *Nature*  
632 **415**, 1030-4 (2002).
- 633 29. Zhao C, Deng W, Gage FH. Mechanisms and Functional Implications of Adult  
634 Neurogenesis. *Cell*. **132**, 645-60 (2008).
- 635 30. Couillard-Despres S et al. Doublecortin expression levels in adult brain reflect  
636 neurogenesis, *Eur. J. Neurosci*. **21**, 1-14 (2005).
- 637 31. Von Bohlen Und Halbach O, Immunohistological markers for staging  
638 neurogenesis in adult hippocampus. *Cell Tissue Res*. **329**, 409-20 (2007).
- 639 32. Francis F et al. Doublecortin is a developmentally regulated, microtubule-  
640 associated protein expressed in migrating and differentiating neurons, *Neuron*  
641 **23**, 247-56 (1999).
- 642 33. Gleeson JG, Peter LT, Flanagan LA, Walsh CA, Doublecortin is a microtubule-  
643 associated protein and is expressed widely by migrating neurons, *Neuron* **23**,  
644 257-71 (1999).
- 645 34. Beglopoulos V et al. Neurexophilin 3 Is Highly Localized in Cortical and  
646 Cerebellar Regions and Is Functionally Important for Sensorimotor Gating and  
647 Motor Coordination, *Mol. Cell. Biol*. **25**, 7278-88 (2005).
- 648 35. Tessarz P, Kouzarides T. Histone core modifications regulating nucleosome  
649 structure and dynamics, *Nat. Rev. Mol. Cell Biol*. **15**, 703-8 (2014).
- 650 36. Bjornsson HT. The Mendelian disorders of the epigenetic machinery. *Genome*  
651 *Res*. **25**, 1473-81 (2015).
- 652 37. Faundes V et al. Histone Lysine Methylases and Demethylases in the Landscape  
653 of Human Developmental Disorders, *Am. J. Hum. Genet*. **102**, 175-187 (2018).
- 654 38. Alarcón JM et al. Chromatin acetylation, memory, and LTP are impaired in  
655 CBP+/- mice: a model for the cognitive deficit in Rubinstein-Taybi syndrome and  
656 its amelioration. *Neuron*. **42**, 947-59 (2004).
- 657 39. Harris J, Mahone EM, Bjornsson HT. Molecularly confirmed Kabuki (Niikawa-  
658 Kuroki) syndrome patients demonstrate a specific cognitive profile with extensive  
659 visuospatial abnormalities. *J. Intellect. Disabil. Res*. **63**, 489-497 (2019).
- 660 40. van Dongen L et al. Exploring the cognitive phenotype of Kabuki (Niikawa-  
661 Kuroki) syndrome., *J. Intellect. Disabil. Res*. **63**, 498-506 (2019).
- 662 41. Boisgontier J. et al. Anatomical and functional abnormalities on MRI in kabuki  
663 syndrome *NeuroImage Clin*. **21**, 101610 (2018).



- 664 42. Bochar DA et al. Functional Interplay between Histone Demethylase and  
665 Deacetylase Enzymes, *Mol. Cell. Biol.* **26**, 6395-402 (2006).
- 666 43. Wynder C, Hakimi MA, Epstein JA, Shilatifard A, Shiekhattar R. Recruitment of  
667 MLL by HMG-domain protein iBRAF promotes neural differentiation, *Nat. Cell*  
668 *Biol.* **7**, 1113-7 (2005).
- 669 44. Tunovic S, Barkovich J, Sherr EH, Slavotinek AM. De novo ANKRD11 and  
670 KDM1A gene mutations in a male with features of KBG syndrome and Kabuki  
671 syndrome, *Am. J. Med. Genet. Part A.* **164A**, 1744-9 (2014).
- 672 45. Chong JX et al. Gene discovery for Mendelian conditions via social networking:  
673 De novo variants in KDM1A cause developmental delay and distinctive facial  
674 features. *Genet. Med.* **18**, 788-95 (2016).
- 675 46. Pilotto S et al. LSD1 / KDM1A mutations associated to a newly described form of  
676 intellectual disability impair demethylase activity and binding to transcription  
677 factors, *Hum. Mol. Genet.* **25**, 2578-2587 (2017).
- 678 47. Rusconi F et al. LSD1 modulates stress-evoked transcription of immediate early  
679 genes and emotional behavior, *Proc. Natl. Acad. Sci.* **113**, 3651-6 (2016).
- 680 48. Rusconi F, Grillo B, Toffolo E, Mattevi A, Battaglioli E. NeuroLSD1: Splicing-  
681 Generated Epigenetic Enhancer of Neuroplasticity. *Trends Neurosci.* **40**, 28-38  
682 (2017).
- 683 49. Bögershausen N et al. RAP1-mediated MEK/ERK pathway defects in Kabuki  
684 syndrome, *J. Clin. Invest.* **125**, 3585-99 (2015).
- 685 50. Tsai IC et al. Small molecule inhibition of RAS/MAPK signaling ameliorates  
686 developmental pathologies of Kabuki Syndrome, *Sci. Rep.* **8**, 10779 (2018).

687

688

689 **Figures**

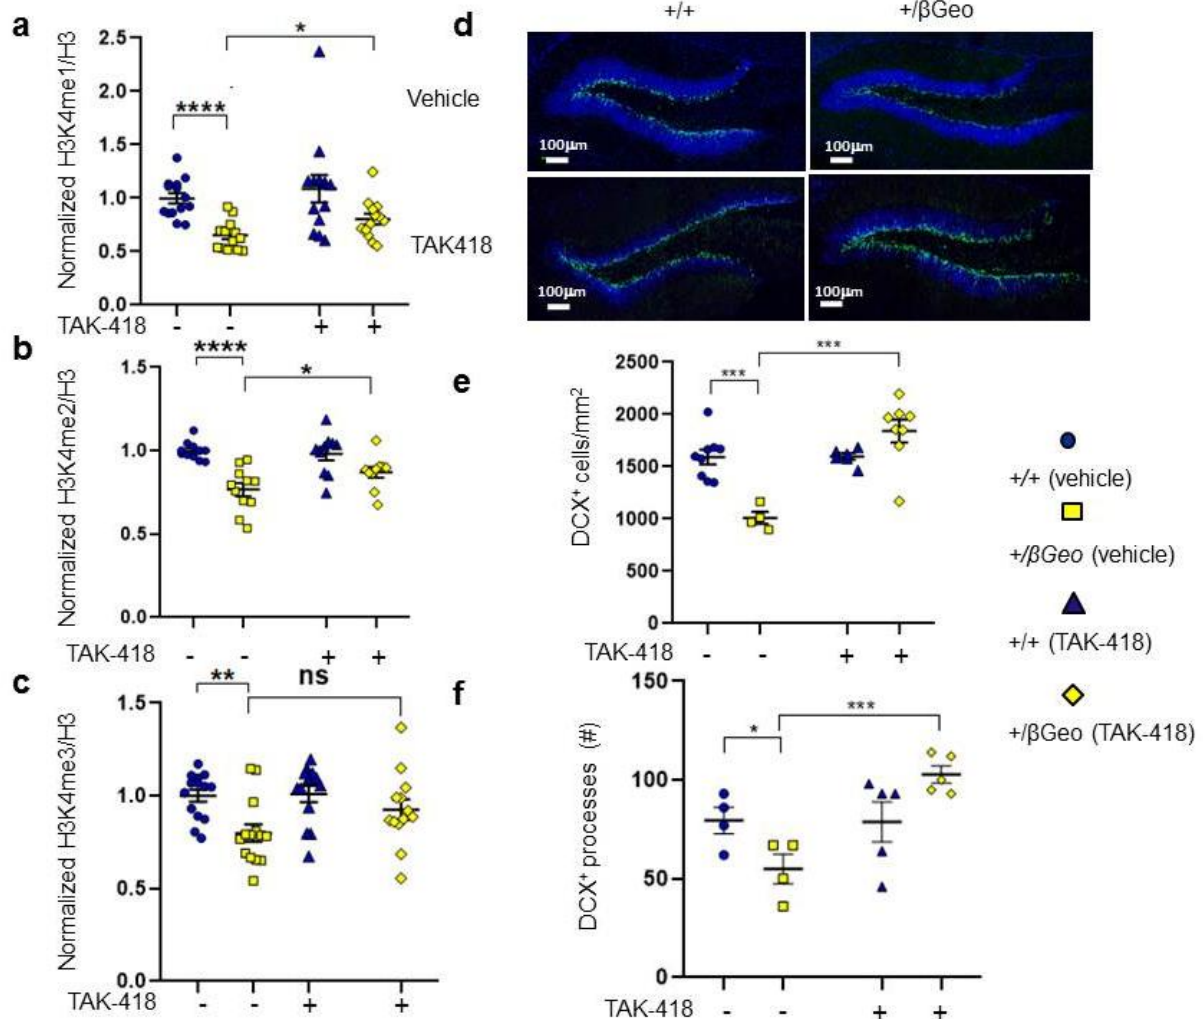

690

691 **Fig. 1: TAK-418 rescues histone H3K4 methylation abnormalities and**  
 692 **neurogenesis defects in hippocampus of *Kmt2d*<sup>+/ $\beta$ Geo</sup> mice.** Quantification of  
 693 H3K4me1, H3K4me2, and H3K4me3 levels from Western blots of hippocampal lysates  
 694 from both genotypes with and without 2 weeks of TAK-418 treatment (a-c). A deficiency  
 695 of DCX<sup>+</sup> cells in the granule cell layer of the hippocampus seen in *Kmt2d*<sup>+/ $\beta$ Geo</sup> mice  
 696 compared to littermates normalizes after 2 weeks of TAK-418 (d, e). A defect of the  
 697 number of DCX<sup>+</sup> processes is also rescued after 2 weeks on TAK-418 (f). Student's t-  
 698 test. \*p < 0.05, \*\*p < 0.01, \*\*\*p < 0.005, \*\*\*\*p < 0.001.

699

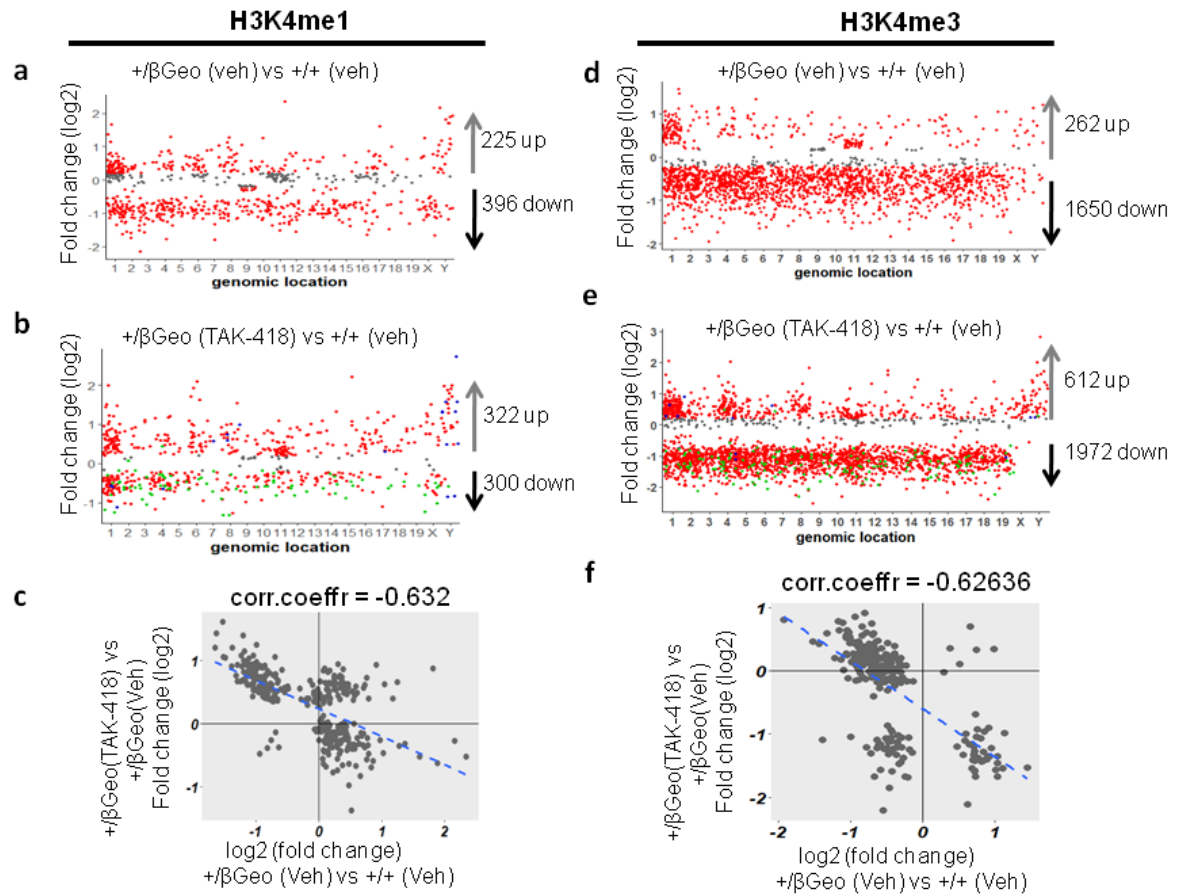

700

701 **Fig. 2: Hippocampal genome wide levels of H3K4me1 and H3K4me3 demonstrate**

702 **TAK-418-dependent rescue.** Comparison of hippocampal H3K4me1 levels of

703 *Kmt2d*<sup>+βGeo</sup> on vehicle or TAK-418 compared to *Kmt2d*<sup>+/+</sup> on vehicle (**a, b, c**).

704 Comparison of hippocampal H3K4me3 levels of *Kmt2d*<sup>+βGeo</sup> on vehicle or TAK-418

705 compared to *Kmt2d*<sup>+/+</sup> on vehicle (**d, e, f**). Each point corresponds to a genomic location

706 of a peak with a statistically significant difference between the two genotypes. Log2 fold

707 change >0.2 or <0.2 are in red, and others are in gray. To allow visualization of changes

708 upon TAK-418 treatment the green dots indicate H3K4me1/3-bound locations that were

709 significantly increased in *Kmt2d*<sup>+βGeo</sup> mice on vehicle (**b,e**) and blue dots indicate

710 H3K4me1/3-bound peaks that were decreased in *Kmt2d*<sup>+βGeo</sup> on vehicle (**b,e**).

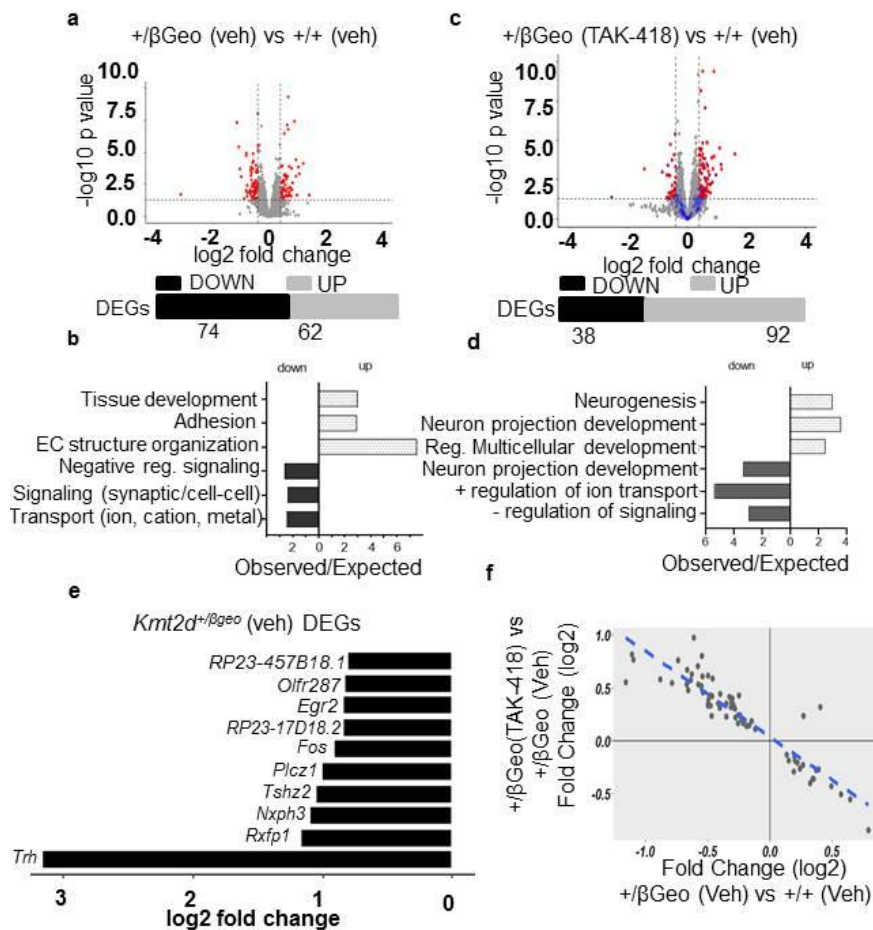

711

712 **Fig. 3: TAK-418 rescues gene expression abnormalities in  $Kmt2d^{+\beta\text{Geo}}$  mice.** An  
 713 overview of gene expression abnormalities (volcano plot, **a**) and a summary of major  
 714 gene categories (**b**) among differentially expressed genes (DEGs) in hippocampus when  
 715 comparing  $Kmt2d^{+\beta\text{Geo}}$  and  $Kmt2d^{+/+}$  on vehicle. Many of the DEGs from vehicle  
 716 treatment (**a**) were normalized (blue dots in **c**) upon a comparison of hippocampal gene  
 717 expression levels between  $Kmt2d^{+\beta\text{Geo}}$  on TAK-418 and  $Kmt2d^{+/+}$  on vehicle (**c, d**). Red  
 718 dots are differentially expressed genes with absolute log2 fold change  $\geq 0.5$  and P-  
 719 value  $< 0.05$ . A view of representative (top 10, all downregulated) DEGs between  
 720  $Kmt2d^{+\beta\text{Geo}}$  and  $Kmt2d^{+/+}$  on vehicle (**e**). A correlation of DEGs in  $Kmt2d^{+\beta\text{Geo}}$  (TAK-

721 418/vehicle) and the two genotypes ( $Kmt2d^{+/βGeo}/Kmt2d^{+/+}$  on vehicle) reveals TAK-418-  
722 dependent rescue (f).

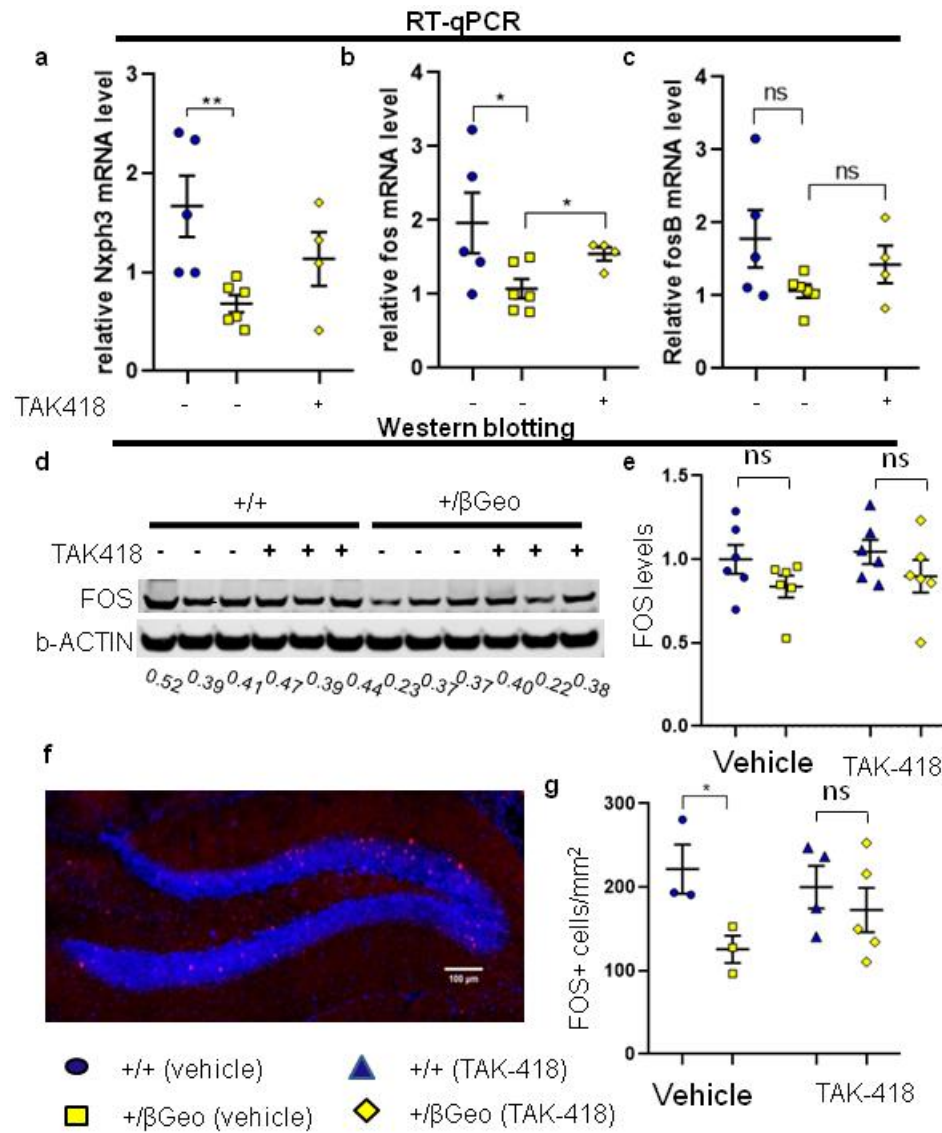

**Fig. 4: Gene**

723

724 **expression abnormalities of disease-relevant candidate genes in *Kmt2d*<sup>+βGeo</sup> mice**

725 **are reflected in abnormal RT-qPCR, Western blot, and immunofluorescence**

726 **staining. *Nxp3*, *fos* and *fosB* are disease-relevant DEGs and all demonstrate**

727 consistent decreased gene expression in *Kmt2d*<sup>+βGeo</sup> mice compared to littermates and

728 these changes rescue with TAK-418 (a, b, c). Western blotting of FOS reveals a defect

729 at the protein level in *Kmt2d*<sup>+βGeo</sup> mice compared to littermates (with some rescue, d, e).

730 Immunofluorescence staining of tissue slices from *Kmt2d*<sup>+βGeo</sup> mice and littermates

731 demonstrate a significant defect that rescues upon TAK-418 treatment (f, g). f is a



732 representative immunofluorescence image of FOS from *Kmt2d*<sup>+/ $\beta$ Geo</sup> treated with TAK-

733 418. Student's t-test, \*p < 0.05, \*\*p < 0.01.

734

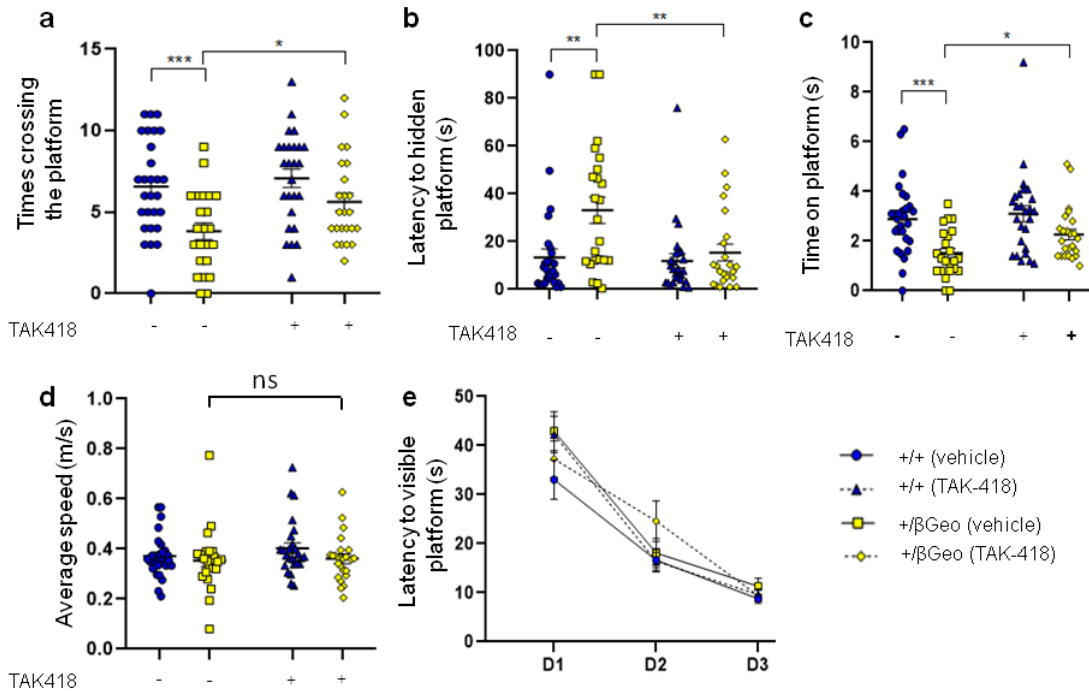

735

736 **Fig. 5: TAK-418 rescues the visual spatial learning and memory defect in**  
737 ***Kmt2d*<sup>+βGeo</sup> mice. *Kmt2d*<sup>+βGeo</sup> mice have significant abnormalities in the number of times**  
738 **crossing platform area during probe trial (a), latency to find platform (b) and time spent**  
739 **on platform (c); all defects are rescue on TAK-418. These results are not confounded by**  
740 **muscle strength or vision, as *Kmt2d*<sup>+βGeo</sup> mice have similar average speed (d) and no**  
741 **significant defects in a visual flag finding regimen compared to *Kmt2d*<sup>+βGeo</sup> mice (e), t-**  
742 **test (a-d), Repeated measures ANOVA (e), \*p < 0.05, \*\*p < 0.01, \*\*\*p < 0.005.**
