# Supplementary material for: Inhibition of KDM1A activity restores adult neurogenesis and improves hippocampal memory in a mouse model of Kabuki syndrome
Source: bioRxiv or medRxiv preprint supplement (doi:10.1101/2020.03.11.986976), 2020-03-11
Supplement: Supplementary file [file media-1.pdf]

**Table S1. Differentially bound H3K4me1 peaks from comparison of *Kmt2d*<sup>+/ $\beta$ Geo</sup> mice treated with vehicle versus *Kmt2d*<sup>+/ $\beta$</sup>  mice treated with vehicle**

| Chr                  | Start    | End      | Distance to TSS | Fold change | P-value  | Symbol               |
|----------------------|----------|----------|-----------------|-------------|----------|----------------------|
| <b>Upregulated</b>   |          |          |                 |             |          |                      |
| chr1                 | 24684051 | 24684350 | 5282            | 3.15        | 4.56E-08 | <i>Lmbrd1</i>        |
| chr17                | 13587351 | 13587750 | -33456          | 3.04        | 3.73E-13 | <i>2700054A10Rik</i> |
| chr11                | 31922601 | 31922900 | -42883          | 2.98        | 4.82E-13 | <i>4930524B15Rik</i> |
| chr1                 | 85528851 | 85529150 | 69810           | 2.57        | 3.05E-06 | <i>Sp110</i>         |
| <b>Downregulated</b> |          |          |                 |             |          |                      |
| chr3                 | 75492601 | 75492950 | 64077           | 0.22        | 1.71E-07 | <i>Pdcd10</i>        |
| chr7                 | 83179601 | 83179950 | 31305           | 0.29        | 1.04E-08 | <i>A530021J07Rik</i> |
| chr4                 | 1.46E+08 | 1.46E+08 | 16203           | 0.29        | 1.98E-05 | <i>Zfp980</i>        |
| chr2                 | 1.62E+08 | 1.62E+08 | -275288         | 0.30        | 3.48E-07 | <i>Ptprtos</i>       |
| chr16                | 67016151 | 67016500 | 359207          | 0.32        | 1.64E-11 | <i>1700010K23Rik</i> |
| chr1                 | 85180451 | 85180750 | -19011          | 0.32        | 1.72E-06 | <i>Gm7609</i>        |
| chr2                 | 1.34E+08 | 1.34E+08 | 128852          | 0.33        | 2.81E-06 | <i>Hao1</i>          |
| chr3                 | 69799701 | 69800050 | 60019           | 0.34        | 2.1E-08  | <i>Sptssb</i>        |
| chr12                | 44648151 | 44648500 | 319440          | 0.34        | 6.68E-10 | <i>Nrcam</i>         |
| chr2                 | 1.77E+08 | 1.77E+08 | -25325          | 0.34        | 6.84E-06 | <i>Gm14295</i>       |
| chr11                | 1.1E+08  | 1.1E+08  | -9049           | 0.35        | 1.48E-14 | <i>Abca6</i>         |
| chr16                | 39393901 | 39394250 | 491730          | 0.36        | 8.15E-09 | <i>Igsf11</i>        |
| chr18                | 19039551 | 19039850 | 962397          | 0.36        | 3.8E-06  | <i>Dsc3</i>          |
| chr15                | 36567701 | 36568000 | -12278          | 0.38        | 9.4E-08  | <i>Snx31</i>         |
| chr2                 | 1.24E+08 | 1.24E+08 | -269444         | 0.39        | 4.97E-10 | <i>Sema6d</i>        |
| chr4                 | 1.48E+08 | 1.48E+08 | 3533            | 0.39        | 0.000696 | <i>Zfp979</i>        |
| chr11                | 39221751 | 39222050 | 168325          | 0.39        | 2.27E-08 | <i>4930553C11Rik</i> |
| chr1                 | 85238501 | 85238800 | 31916           | 0.39        | 0.000908 | <i>C130026I21Rik</i> |
| chr7                 | 1.23E+08 | 1.23E+08 | 55509           | 0.39        | 3.19E-05 | <i>4930413G21Rik</i> |
| chr12                | 1.06E+08 | 1.06E+08 | -43909          | 0.40        | 1.8E-12  | <i>1700121N20Rik</i> |
| chr19                | 53964301 | 53964650 | 19599           | 0.40        | 8.38E-07 | <i>Shoc2</i>         |
| chr17                | 16379951 | 16380250 | -553514         | 0.40        | 8.38E-10 | <i>Rgmb</i>          |
| chr11                | 46955651 | 46956000 | 145026          | 0.40        | 2.37E-05 | <i>Timd4</i>         |
| chr2                 | 82344951 | 82345300 | 291467          | 0.41        | 6.32E-14 | <i>Zfp804a</i>       |

**Table S2. Differentially bound H3K4me1 peaks upon comparing *Kmt2d*<sup>+/βGeo</sup> mutant mice treated with TAK-418 versus *Kmt2d*<sup>+/+</sup> mice treated with vehicle**

| Chr                  | Start    | End      | Distance to TSS | Fold change | P-value  | Description          |
|----------------------|----------|----------|-----------------|-------------|----------|----------------------|
| <b>Upregulated</b>   |          |          |                 |             |          |                      |
| chr15                | 38308451 | 38308800 | -7914           | 4.580961    | 1.09E-13 | <i>Klf10</i>         |
| chr6                 | 47757851 | 47758150 | -5075           | 4.23132     | 2.01E-08 | <i>Rn4.5s</i>        |
| chr1                 | 24684051 | 24684350 | 5282            | 3.949866    | 6.11E-09 | <i>Lmbrd1</i>        |
| chr6                 | 47672201 | 47672550 | 24              | 3.767908    | 2.43E-10 | <i>Rn4.5s</i>        |
| chr6                 | 1.16E+08 | 1.16E+08 | -27345          | 3.241102    | 3.45E-10 | <i>Plxnd1</i>        |
| chr6                 | 4923851  | 4924250  | 20730           | 3.084724    | 1.32E-08 | <i>Ppp1r9a</i>       |
| chr8                 | 39152901 | 39153300 | -144880         | 2.902813    | 1.98E-07 | <i>Gm6213</i>        |
| chr1                 | 1.71E+08 | 1.71E+08 | 602             | 2.835173    | 2.93E-08 | <i>Mir6546</i>       |
| chrX                 | 1.7E+08  | 1.7E+08  | -17458          | 2.834468    | 8.93E-17 | <i>G530011O06Rik</i> |
| chr1                 | 69456651 | 69457000 | 229135          | 2.756085    | 5.28E-08 | <i>Ikzf2</i>         |
| chr1                 | 88257601 | 88258050 | 11583           | 2.689857    | 3.49E-07 | <i>6430706D22Rik</i> |
| chr14                | 1.23E+08 | 1.23E+08 | 34747           | 2.478949    | 5.06E-05 | <i>Pcca</i>          |
| chr17                | 13305901 | 13306450 | -48397          | 2.451861    | 1.63E-51 | <i>Tcp10c</i>        |
| chrX                 | 1.7E+08  | 1.7E+08  | -26258          | 2.40602     | 5.48E-33 | <i>G530011O06Rik</i> |
| chr1                 | 1E+08    | 1E+08    | 407535          | 2.316954    | 6.16E-05 | <i>Cntnap5b</i>      |
| chrX                 | 1.7E+08  | 1.7E+08  | -15508          | 2.311163    | 9.46E-27 | <i>G530011O06Rik</i> |
| chr4                 | 3176851  | 3177150  | 4917            | 2.299987    | 2.06E-06 | <i>Vmn1r2</i>        |
| chr1                 | 88286301 | 88287250 | -9196           | 2.294952    | 1.11E-10 | <i>Hjrp</i>          |
| chr18                | 82170301 | 82170950 | -178545         | 2.293223    | 8.63E-15 | <i>Mir5127</i>       |
| chr4                 | 1.47E+08 | 1.47E+08 | 99559           | 2.250408    | 3.67E-06 | <i>Zfp982</i>        |
| chr16                | 3239551  | 3239950  | -352648         | 2.226777    | 6.48E-06 | <i>Olfr161</i>       |
| chr4                 | 1.22E+08 | 1.22E+08 | -500850         | 2.217059    | 2.41E-05 | <i>Gm12887</i>       |
| chr17                | 57855901 | 57856300 | 86530           | 2.144734    | 8.81E-11 | <i>Cntnap5c</i>      |
| <b>Downregulated</b> |          |          |                 |             |          |                      |
| chr1                 | 85463551 | 85463850 | 135110          | 0.462643    | 4.47E-05 | <i>Sp110</i>         |
| chr4                 | 1.47E+08 | 1.47E+08 | -128525         | 0.444317    | 0.000501 | <i>Rex2</i>          |
| chr1                 | 85010801 | 85011150 | -75892          | 0.436585    | 6.64E-05 | <i>Slc16a14</i>      |
| chrX                 | 1.27E+08 | 1.27E+08 | 140604          | 0.425518    | 2.04E-09 | <i>4932411N23Rik</i> |
| chr1                 | 85312151 | 85312500 | -41759          | 0.419504    | 0.000288 | <i>C130026I21Rik</i> |
| chr8                 | 95117501 | 95117800 | -4308           | 0.413902    | 2.52E-05 | <i>Kifc3</i>         |
| chr8                 | 20382251 | 20382600 | -19223          | 0.398451    | 1.19E-05 | <i>Gm15319</i>       |

**Table S3. Differentially bound H3K4me3 peaks upon comparison of *Kmt2d*<sup>+/ $\beta$ Geo</sup> on vehicle versus *Kmt2d*<sup>+/<sup>+</sup></sup> mice treated with vehicle.**

| Symbol               | Chr   | Start    | End      | P-value  | Fold change | Description                                                                        |
|----------------------|-------|----------|----------|----------|-------------|------------------------------------------------------------------------------------|
| <b>Upregulated</b>   |       |          |          |          |             |                                                                                    |
| <i>Cnot9</i>         | chr1  | 74506301 | 74506800 | 5.83E-06 | 2.750       | CCR4-NOT transcription complex, subunit 9                                          |
| <i>Zfp800</i>        | chr6  | 28261001 | 28261350 | 5.95E-04 | 2.500       | zinc finger protein 800                                                            |
| <b>Downregulated</b> |       |          |          |          |             |                                                                                    |
| <i>Tspan2</i>        | chr3  | 1.03E+08 | 1.03E+08 | 1.73E-07 | 0.258       | tetraspanin 2                                                                      |
| <i>B3gnt5</i>        | chr16 | 19761051 | 19761400 | 1.83E-06 | 0.264       | UDP-GlcNAc:betaGal beta-1,3-N-acetylglucosaminyltransferase 5                      |
| <i>Zbtb18</i>        | chr1  | 1.77E+08 | 1.77E+08 | 4.31E-07 | 0.271       | zinc finger and BTB domain containing 18                                           |
| <i>4833420G17Rik</i> | chr13 | 1.19E+08 | 1.19E+08 | 2.53E-02 | 0.280       | RIKEN cDNA 4833420G17 gene                                                         |
| <i>Ddx3x</i>         | chrX  | 13281151 | 13281800 | 2.54E-12 | 0.299       | DEAD/H (Asp-Glu-Ala-Asp/His) box polypeptide 3, X-linked                           |
| <i>Zfp503</i>        | chr14 | 21987651 | 21987750 | 1.23E-02 | 0.315       | zinc finger protein 503                                                            |
| <i>Asns</i>          | chr6  | 7692901  | 7693200  | 1.05E-06 | 0.318       | asparagine synthetase                                                              |
| <i>Mfap1b</i>        | chr2  | 1.21E+08 | 1.21E+08 | 2.46E-05 | 0.319       | microfibrillar-associated protein 1B                                               |
| <i>Cfap36</i>        | chr11 | 29247101 | 29247400 | 4.37E-05 | 0.321       | cilia and flagella associated protein 36                                           |
| <i>Nfkbiz</i>        | chr16 | 55821701 | 55822050 | 9.65E-06 | 0.323       | nuclear factor of kappa light polypeptide gene enhancer in B cells inhibitor, zeta |
| <i>Osbp16</i>        | chr2  | 76406201 | 76406400 | 2.10E-03 | 0.323       | oxysterol binding protein-like 6                                                   |
| <i>Tubb4a</i>        | chr17 | 57087351 | 57087500 | 3.21E-03 | 0.327       | tubulin, beta 4A class IVA                                                         |
| <i>Rerg</i>          | chr6  | 1.37E+08 | 1.37E+08 | 4.38E-04 | 0.327       | RAS-like, estrogen-regulated, growth-inhibitor                                     |
| <i>Pagr1a</i>        | chr7  | 1.27E+08 | 1.27E+08 | 1.37E-04 | 0.332       | PAXIP1 associated glutamate rich protein 1A                                        |
| <i>Cacfd1</i>        | chr2  | 27010051 | 27010400 | 3.73E-06 | 0.341       | calcium channel flower domain containing 1                                         |
| <i>Tmem151b</i>      | chr17 | 45549251 | 45549650 | 1.60E-05 | 0.342       | transmembrane protein 151B                                                         |
| <i>Hebp1</i>         | chr6  | 1.35E+08 | 1.35E+08 | 2.36E-04 | 0.347       | heme binding protein 1                                                             |
| <i>Tmem55a</i>       | chr4  | 14864301 | 14864750 | 1.73E-07 | 0.348       | transmembrane protein 55A                                                          |
| <i>Narf</i>          | chr11 | 1.21E+08 | 1.21E+08 | 6.89E-06 | 0.348       | nuclear prelamin A recognition factor                                              |
| <i>BC055324</i>      | chr1  | 1.64E+08 | 1.64E+08 | 7.22E-04 | 0.348       | cDNA sequence BC055324                                                             |
| <i>Akap1</i>         | chr11 | 88864201 | 88864600 | 1.06E-06 | 0.349       | A kinase (PRKA) anchor protein 1                                                   |
| <i>Etv1</i>          | chr12 | 38778801 | 38779250 | 2.76E-05 | 0.350       | ets variant 1                                                                      |

**Table S4. Differentially bound H3K4me3 peaks upon comparison of *Kmt2d*<sup>+/βGeo</sup> mice on TAK-418 versus *Kmt2d*<sup>+/+</sup> mice treated with vehicle.**

| Symbol                          | Chr   | Start    | End      | P-value  | Fold change | Gene.Description                                                              |
|---------------------------------|-------|----------|----------|----------|-------------|-------------------------------------------------------------------------------|
| <b>Upregulated</b>              |       |          |          |          |             |                                                                               |
| <i>Col19a1</i>                  | chr1  | 24613301 | 24613950 | 4.99E-17 | 4.091       | collagen, type XIX, alpha 1                                                   |
| <i>Ajap1</i>                    | chr4  | 1.53E+08 | 1.53E+08 | 2.81E-14 | 4.050       | adherens junction associated protein 1                                        |
| <i>6820431F2</i><br><i>ORik</i> | chr8  | 20150551 | 20150950 | 4.31E-08 | 3.538       | cadherin 11 pseudogene                                                        |
| <b>Downregulated</b>            |       |          |          |          |             |                                                                               |
| <i>Ddx6</i>                     | chr9  | 44605601 | 44606000 | 3.11E-07 | 0.172       | DEAD (Asp-Glu-Ala-Asp) box polypeptide 6                                      |
| <i>B430212C0</i><br><i>6Rik</i> | chr18 | 67343651 | 67344100 | 9.01E-10 | 0.188       | RIKEN cDNA B430212C06 gene                                                    |
| <i>2310022B0</i><br><i>5Rik</i> | chr8  | 1.25E+08 | 1.25E+08 | 9.21E-11 | 0.200       | RIKEN cDNA 2310022B05 gene                                                    |
| <i>1810014B0</i><br><i>1Rik</i> | chr10 | 86685501 | 86685950 | 9.46E-09 | 0.202       | RIKEN cDNA 1810014B01 gene                                                    |
| <i>Smad7</i>                    | chr18 | 75342701 | 75343050 | 4.97E-07 | 0.207       | SMAD family member 7                                                          |
| <i>Mri1</i>                     | chr8  | 84256851 | 84257250 | 1.57E-07 | 0.208       | methylthioribose-1-phosphate isomerase 1                                      |
| <i>Rela</i>                     | chr19 | 5637651  | 5638050  | 1.89E-07 | 0.211       | v-rel reticuloendotheliosis viral oncogene homolog A (avian)                  |
| <i>Trim59</i>                   | chr3  | 69044301 | 69044800 | 5.31E-11 | 0.212       | tripartite motif-containing 59                                                |
| <i>Lca5l</i>                    | chr16 | 96191901 | 96192300 | 7.84E-07 | 0.221       | Leber congenital amaurosis 5-like                                             |
| <i>Vapb</i>                     | chr2  | 1.74E+08 | 1.74E+08 | 6.89E-09 | 0.229       | vesicle-associated membrane protein, associated protein B and C               |
| <i>Pskh1</i>                    | chr8  | 1.06E+08 | 1.06E+08 | 2.49E-06 | 0.232       | protein serine kinase H1                                                      |
| <i>Parp4</i>                    | chr14 | 56575501 | 56575850 | 6.95E-05 | 0.238       | poly (ADP-ribose) polymerase family, member 4                                 |
| <i>Suclg2</i>                   | chr6  | 95718501 | 95718850 | 1.37E-06 | 0.239       | succinate-Coenzyme A ligase, GDP-forming, beta subunit                        |
| <i>Mfap3l</i>                   | chr8  | 60632351 | 60632700 | 1.92E-05 | 0.239       | microfibrillar-associated protein 3-like                                      |
| <i>Patl1</i>                    | chr19 | 11912601 | 11913150 | 3.19E-07 | 0.241       | protein associated with topoisomerase II homolog 1 (yeast)                    |
| <i>Tmem120b</i>                 | chr5  | 1.23E+08 | 1.23E+08 | 1.96E-05 | 0.242       | transmembrane protein 120B                                                    |
| <i>Them6</i>                    | chr15 | 74721351 | 74721800 | 5.89E-07 | 0.247       | thioesterase superfamily member 6                                             |
| <i>Ptov1</i>                    | chr7  | 44869301 | 44869700 | 4.36E-06 | 0.253       | prostate tumor over expressed gene 1                                          |
| <i>Zfp334</i>                   | chr2  | 1.65E+08 | 1.65E+08 | 5.89E-06 | 0.255       | zinc finger protein 334                                                       |
| <i>Mir6921</i>                  | chr11 | 60176651 | 60177250 | 5.64E-07 | 0.255       | microRNA 6921                                                                 |
| <i>Dcaf5</i>                    | chr12 | 80434951 | 80435350 | 8.47E-08 | 0.256       | DDB1 and CUL4 associated factor 5                                             |
| <i>Slc1a2</i>                   | chr2  | 1.03E+08 | 1.03E+08 | 6.06E-06 | 0.257       | solute carrier family 1 (glial high affinity glutamate transporter), member 2 |
| <i>Zbtb43</i>                   | chr2  | 33468101 | 33468500 | 2.43E-06 | 0.258       | zinc finger and BTB domain containing 43                                      |
| <i>Exosc9</i>                   | chr3  | 36552651 | 36553000 | 6.43E-05 | 0.259       | exosome component 9                                                           |

**Table S5. Differentially expressed genes upon comparison of *Kmt2d*<sup>+/βGeo</sup> mice on vehicle versus *Kmt2d*<sup>+/+</sup> mice on vehicle.**

| Symbol               | Description                                                          | Fold change | P value  |
|----------------------|----------------------------------------------------------------------|-------------|----------|
| <b>Upregulated</b>   |                                                                      |             |          |
| <i>Nlrp5-ps</i>      | NLR family, pyrin domain containing 5, pseudogene                    | 2.319       | 7.69E-05 |
| <i>Onecut1</i>       | one cut domain, family member 1                                      | 2.095       | 4.82E-04 |
| <i>Fmod</i>          | Fibromodulin                                                         | 1.734       | 1.75E-04 |
| <i>A4galt</i>        | alpha 1,4-galactosyltransferase                                      | 1.722       | 2.41E-02 |
| <i>Clec3b</i>        | C-type lectin domain family 3, member b                              | 1.719       | 7.90E-03 |
| <i>Ptx3</i>          | pentraxin related gene                                               | 1.642       | 1.83E-02 |
| <i>Mlph</i>          | Melanophilin                                                         | 1.638       | 2.10E-02 |
| <i>Xdh</i>           | xanthine dehydrogenase                                               | 1.636       | 1.23E-02 |
| <i>Kcnh6</i>         | potassium voltage-gated channel, subfamily H (eag-related), member 6 | 1.601       | 4.75E-10 |
| <i>Eln</i>           | Elastin                                                              | 1.587       | 1.71E-07 |
| <i>F13a1</i>         | coagulation factor XIII, A1 subunit                                  | 1.575       | 2.59E-02 |
| <b>Downregulated</b> |                                                                      |             |          |
| <i>Trh</i>           | thyrotropin releasing hormone                                        | 0.112       | 1.85E-02 |
| <i>Rxfp1</i>         | relaxin/insulin-like family peptide receptor 1                       | 0.448       | 5.10E-08 |
| <i>Nxph3</i>         | neurexophilin 3                                                      | 0.469       | 3.92E-06 |
| <i>Tshz2</i>         | teashirt zinc finger family member 2                                 | 0.484       | 1.94E-04 |
| <i>Plcz1</i>         | phospholipase C, zeta 1                                              | 0.500       | 8.14E-04 |
| <i>Fos</i>           | FBJ osteosarcoma oncogene                                            | 0.535       | 4.39E-02 |
| <i>Egr2</i>          | early growth response 2                                              | 0.563       | 8.96E-03 |
| <i>Olfir287</i>      | olfactory receptor 28                                                | 0.567       | 1.79E-05 |
| <i>Susd2</i>         | sushi domain containing 2                                            | 0.577       | 3.78E-03 |
| <i>Nts</i>           | Neurotensin                                                          | 0.577       | 1.48E-02 |
| <i>Nhlh1</i>         | nescient helix loop helix 1                                          | 0.607       | 1.24E-02 |
| <i>Cbln1</i>         | cerebellin 1 precursor protein                                       | 0.625       | 8.97E-03 |
| <i>Otof</i>          | Otoferlin                                                            | 0.627       | 2.46E-04 |
| <i>Olfir55</i>       | olfactory receptor 55                                                | 0.668       | 4.30E-02 |
| <i>Ntn5</i>          | netrin 5                                                             | 0.683       | 1.34E-02 |
| <i>Bub1b</i>         | mitotic checkpoint serine/threonine kinase                           | 0.683       | 3.62E-03 |
| <i>Nov</i>           | nephroblastoma overexpressed gene                                    | 0.685       | 1.12E-02 |
| <i>Igfbp6</i>        | insulin-like growth factor binding protein 6                         | 0.688       | 2.46E-03 |
| <i>Met</i>           | met proto-oncogene                                                   | 0.690       | 2.67E-03 |
| <i>Fosb</i>          | FBJ osteosarcoma oncogene B                                          | 0.696       | 4.73E-03 |
| <i>Arc</i>           | activity regulated cytoskeletal-associated protein                   | 0.730       | 3.76E-02 |
| <i>Junb</i>          | jun B proto-oncogene                                                 | 0.737       | 2.82E-04 |
| <i>Kcnf1</i>         | potassium voltage-gated channel, subfamily F, member 1               | 0.755       | 9.99E-09 |

**Table S6. Differentially expressed genes upon comparison of *Kmt2d*<sup>+/βGeo</sup> mice on TAK-418 versus *Kmt2d*<sup>+/+</sup> mice on vehicle control.**

| Symbol               | Description                                                           | Fold change | P-value  |
|----------------------|-----------------------------------------------------------------------|-------------|----------|
| <b>Upregulated</b>   |                                                                       |             |          |
| <i>Prph</i>          | Peripherin                                                            | 3.040       | 7.04E-05 |
| <i>Atp4a</i>         | ATPase, H+/K+ exchanging, gastric, alpha polypeptide                  | 2.226       | 6.27E-04 |
| <i>Lefty2</i>        | left-right determination factor 2                                     | 2.131       | 3.16E-05 |
| <i>Nlrp5-ps</i>      | NLR family, pyrin domain containing 5, pseudogene                     | 1.953       | 1.51E-03 |
| <i>Gipc3</i>         | GIPC PDZ domain containing family, member 3                           | 1.865       | 1.02E-04 |
| <i>Espn</i>          | Espin                                                                 | 1.863       | 4.17E-10 |
| <i>Arsi</i>          | arylsulfatase i                                                       | 1.788       | 4.62E-03 |
| <i>Onecut1</i>       | one cut domain, family member 1                                       | 1.740       | 5.63E-03 |
| <i>Samd11</i>        | sterile alpha motif domain containing 11                              | 1.710       | 2.11E-02 |
| <i>Ppp1r32</i>       | protein phosphatase 1, regulatory subunit 32                          | 1.692       | 6.83E-03 |
| <i>Slc16a3</i>       | solute carrier family 16 (monocarboxylic acid transporters), member 3 | 1.674       | 1.55E-03 |
| <i>Tnxb</i>          | tenascin XB                                                           | 1.658       | 3.26E-14 |
| <i>Duxbl3</i>        | double homeobox B-like 3                                              | 1.636       | 1.84E-02 |
| <i>Arhgap36</i>      | Rho GTPase activating protein 36                                      | 1.630       | 8.82E-04 |
| <i>Rps6kc1</i>       | ribosomal protein S6 kinase polypeptide 1                             | 1.617       | 4.43E-04 |
| <i>Plp2</i>          | proteolipid protein 2                                                 | 1.615       | 2.60E-03 |
| <i>Lrrn4</i>         | leucine rich repeat neuronal 4                                        | 1.613       | 1.72E-02 |
| <b>Downregulated</b> |                                                                       |             |          |
| <i>Trh</i>           | thyrotropin releasing hormone                                         | 0.167       | 4.40E-02 |
| <i>Baiap2l1</i>      | BAI1-associated protein 2-like 1                                      | 0.362       | 6.94E-04 |
| <i>Egr2</i>          | early growth response 2                                               | 0.550       | 1.02E-03 |
| <i>Cd59a</i>         | CD59a antigen                                                         | 0.612       | 1.65E-03 |
| <i>Otof</i>          | Otoferlin                                                             | 0.627       | 3.62E-04 |
| <i>Ppfibp2</i>       | PTPRF interacting protein, binding protein 2 (liprin beta 2)          | 0.628       | 4.86E-02 |
| <i>Mir129-1</i>      | microRNA 129-1                                                        | 0.636       | 1.66E-03 |
| <i>Rxfp1</i>         | relaxin/insulin-like family peptide receptor 1                        | 0.660       | 1.86E-03 |
| <i>Satb2</i>         | special AT-rich sequence binding protein 2                            | 0.669       | 1.74E-05 |
| <i>Iqub</i>          | IQ motif and ubiquitin domain containing                              | 0.676       | 4.76E-02 |
| <i>Fam46c</i>        | family with sequence similarity 46, member C                          | 0.678       | 2.25E-02 |
