# Supplementary material for: Inhibition of KDM1A activity restores adult neurogenesis and improves hippocampal memory in a mouse model of Kabuki syndrome
Source: bioRxiv or medRxiv preprint supplement (doi:10.1101/2020.03.11.986976), 2020-03-11
Supplement: Supplementary file [file media-2.pdf]

## Supplementary Figures

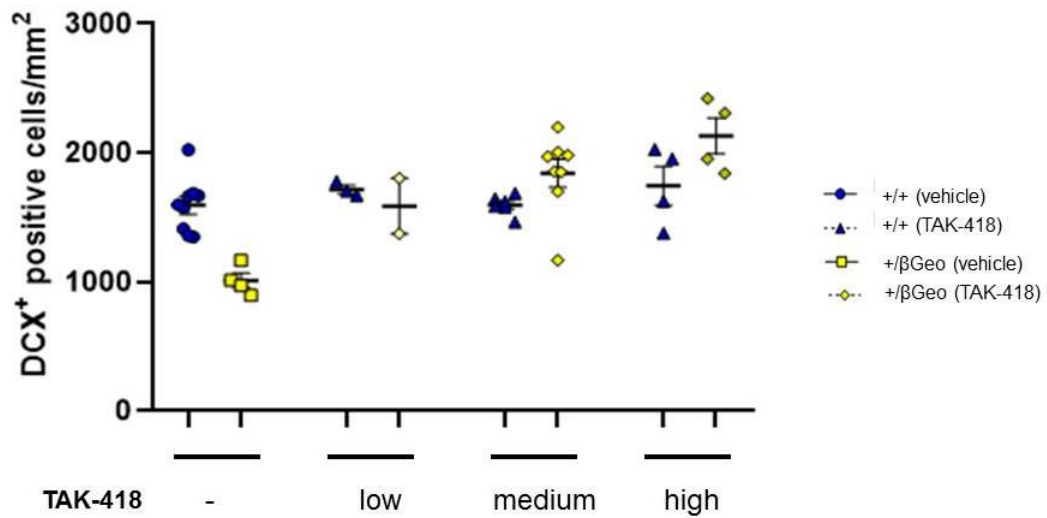

**Supplementary Fig. 1. TAK-418 demonstrates dose-dependent rescue of the number of DCX<sup>+</sup> cells.** Both genotypes were treated with TAK-418 and a dose dependent response on this metric in *Kmt2d*<sup>+βGeo</sup> mice was observed with no obvious effect on *Kmt2d*<sup>+/+</sup> littermates.

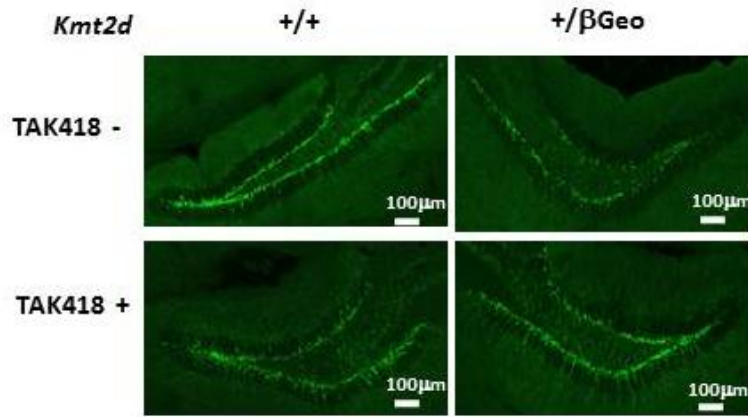

**Supplementary Fig. 2. Representative images of the dentate gyrus after immunofluorescence staining for Doublecortin.** On visual inspection the DCX<sup>+</sup> processes appeared shorter in the *Kmt2d*<sup>+/ $\beta$ Geo</sup> mice compared to wildtype littermates but longer in the *Kmt2d*<sup>+/ $\beta$ Geo</sup> mice on TAK-418.

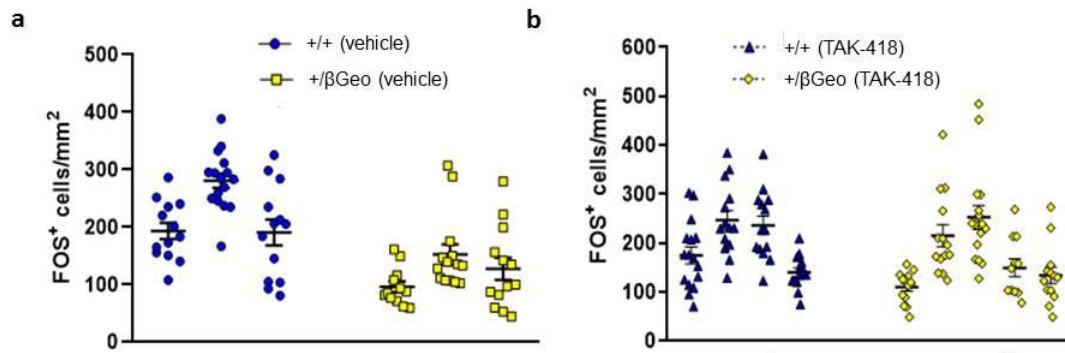

**Supplementary Fig. 3. Quantification of FOS<sup>+</sup> cells in the dentate gyrus area of hippocampus after immunofluorescent staining against FOS.** Each point represents total FOS<sup>+</sup> cells from one brain slice. The mouse genotype and treatment is indicated. These data were averaged for figure 4 (f, g).

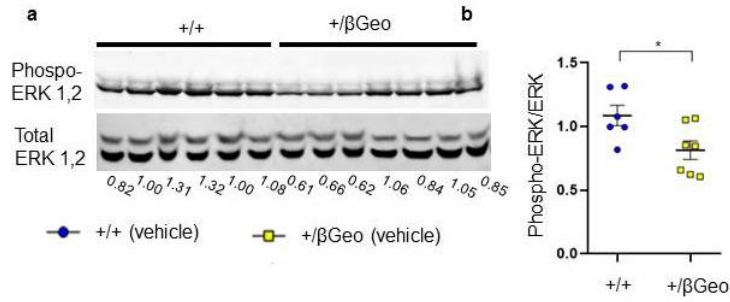

**Supplementary Fig. 4. Hippocampal extracts from *Kmt2d*<sup>+/ $\beta$ Geo</sup> mice reveal a deficiency of ERK activation compared to littermates.** Western blots from *Kmt2d*<sup>+/ $\beta$ Geo</sup> mice and wildtype littermates reveal a decrease in phosphoERK/ERK (**a, b**).

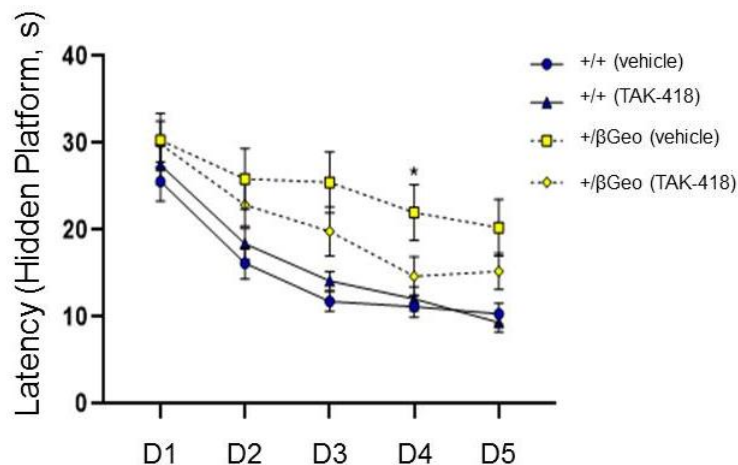

**Supplementary figure 5. The *Kmt2d*<sup>+βGeo</sup> mice demonstrate a trend toward increased latency to reach the hidden platform compared to wildtype littermates which was only significant on day 4.** These data represent our hidden platform training over 5 individual days (D). Each group represents 12-14 mice. \*p < 0.05.

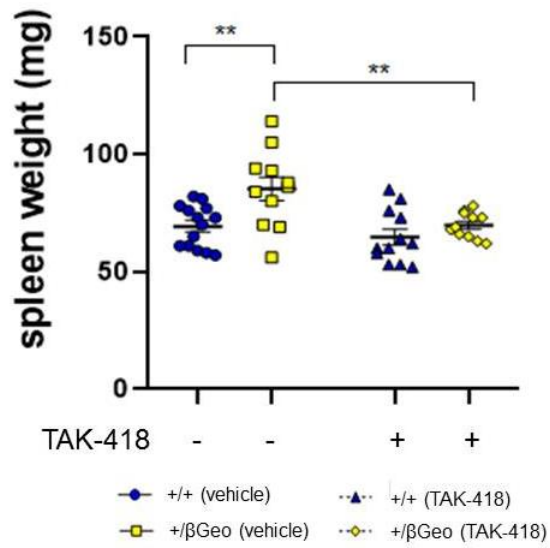

**Supplementary Fig. 6. Splenomegaly normalizes in the *Kmt2d*<sup>+/ $\beta$ Geo</sup> mice treated with TAK-418 for 2 months.** Treatment was initiated at 2 months of age. Spleens were weighed at the time of sacrifice. Each point represents one mouse; the genotype of the mice and treatment received is indicated. \*\*p < 0.01.
